# Supplementary material for: Using Multiscale Spatial Models to Assess Potential Surrogate Habitat for an Imperiled Reptile
Source: PLoS One. 2015 Apr 27;10(4):e0123307. doi: 10.1371/journal.pone.0123307 (PMC4411027; doi:10.1371/journal.pone.0123307)
Supplement: S1 Table — (XLSX) [file pone.0123307.s001.xlsx]

## Sheet: AllData
Type	Response	CanCov	ShrubCov	Snake	Sex	Aspect	Elevation	Cover
Random	0	0.217538	0.00337268	Sam	M	2.62123	-23.3925	FOR
Random	0	0.599333	0.134	Lou	M	3.01564	-27.9657	FOR
Random	0	0.462236	0.120846	Helen	F	2.81088	-24.6587	FOR
Random	0	0.0867698	0.0652921	Phantom	M	2.82425	-22.434	FOR
Random	0	0.463124	0.12039	Phantom	M	2.94173	-25.0248	FOR
Random	0	0.460166	0.00191205	Helen	F	3.41357	-29.8248	FOR
Random	0	0.522639	0.00129366	Edna	F	3.07627	-29.6085	FOR
Random	0	0.371595	0.00583658	Helen	F	2.97421	-28.6153	FOR
Random	0	0.25644	0.00234192	Bridget	F	3.05582	-21.8674	FOR
Random	0	0.371184	0.015873	Phantom	M	2.68669	-29.2233	FOR
Random	0	0.565297	0.0365297	Lou	M	3.00332	-28.1012	FOR
Random	0	0.381733	0.00234192	Phantom	M	2.83123	-29.2639	FOR
Random	0	0.41326	0.00110497	Phantom	M	2.779	-24.3963	FOR
Random	0	0.473255	0.00543971	Jody	M	3.00528	-25.645	FOR
Random	0	0.433437	0.242518	Phantom	M	2.84962	-29.5339	FOR
Random	0	0.528229	0.0464037	Phantom	M	3.17783	-28.355	FOR
Random	0	0.16766	0.00170213	Jody	M	2.46452	-21.3588	FOR
Random	0	0.583511	0.0127932	Phantom	M	2.93825	-29.3695	FOR
Random	0	0.171509	0	Helen	F	2.97364	-22.4609	FOR
Random	0	0.259074	0	Bridget	F	3.26143	-21.3158	FOR
Random	0	0.352997	0.00190295	Bridget	F	3.30477	-28.8005	FOR
Random	0	0.283824	0	Bridget	F	2.82193	-23.1459	FOR
Random	0	0.610865	0.0232816	Jody	M	2.92579	-28.7759	FOR
Random	0	0.494229	0.00271555	Lou	M	3.17314	-29.7763	FOR
Random	0	0.563715	0.0237581	Helen	F	3.15051	-29.9486	FOR
Random	0	0.540856	0.0188067	Sam	M	2.69255	-29.9695	FOR
Random	0	0.520984	0.0065123	Edna	F	3.16967	-29.7453	FOR
Random	0	0.469018	0.056244	Bridget	F	3.08771	-24.415	FOR
Random	0	0.51135	0.00716846	Phantom	M	3.4139	-29.9214	FOR
Random	0	0.406557	0.0775956	Phantom	M	1.82596	-29.7602	FOR
Random	0	0.246753	0	Edna	F	3.11387	-21.827	FOR
Random	0	0.399446	0.0701107	Phantom	M	3.04092	-30.624	FOR
Random	0	0.601334	0.089241	Phantom	M	3.30334	-28.2099	FOR
Random	0	0.228132	0.0390071	Sam	M	2.41789	-29.3023	FOR
Random	0	0.488123	0.00383142	Edna	F	2.66833	-29.6829	FOR
Random	0	0.313622	0	Jody	M	3.03916	-23.8086	FOR
Random	0	0.6216	0.0064	Jack	M	3.38406	-30.0005	FOR
Random	0	0.43952	0.00184672	Edna	F	3.39603	-29.8934	FOR
Random	0	0.486561	0.0321419	Bridget	F	2.79369	-29.2601	FOR
Random	0	0.520068	0.0222032	Bridget	F	2.50581	-25.6294	FOR
Random	0	0.323413	0.0337302	Phantom	M	2.95681	-27.083	FOR
Random	0	0.319569	0.0520646	Sam	M	3.2684	-25.6484	FOR
Random	0	0.102071	0.00295858	Edna	F	3.15866	-21.5134	FOR
Random	0	0.533005	0.00197044	Bridget	F	3.01819	-29.7798	FOR
Random	0	0.184371	0	Bridget	F	3.28853	-23.808	FOR
Random	0	0.454324	0.00487211	Edna	F	2.37822	-28.4432	FOR
Random	0	0.474603	0.00873016	Phantom	M	3.36715	-27.951	FOR
Random	0	0.414027	0.0124434	Phantom	M	2.32512	-24.7007	FOR
Random	0	0.574534	0.0186335	Helen	F	2.97834	-29.7319	FOR
Random	0	0.538139	0.0209556	Jody	M	2.56513	-23.1358	FOR
Random	0	0.0339257	0.116317	Jody	M	3.04277	-30.1404	FOR
Random	0	0.590414	0.0228758	Jody	M	3.0717	-27.434	FOR
Random	0	0.391661	0.00410116	Sam	M	2.85908	-24.9369	FOR
Random	0	0.353947	0.00263158	Phantom	M	2.84995	-29.17	FOR
Random	0	0.556263	0.059448	Bridget	F	2.98926	-30.1228	FOR
Random	0	0.52151	0.00614574	Jody	M	2.84915	-25.8435	FOR
Random	0	0.529412	0.00784314	Phantom	M	3.414	-28.8788	FOR
Random	0	0.689964	0.0250896	Phantom	M	3.20456	-28.7089	FOR
Random	0	0.573288	0.0219178	Bridget	F	3.28602	-25.4936	FOR
Random	0	0.109737	0.0958269	Sam	M	3.03051	-30.3996	FOR
Random	0	0.598002	0.0122982	Edna	F	3.16149	-25.5045	FOR
Random	0	0.232919	0.0207039	Sam	M	2.50395	-24.8763	FOR
Random	0	0.682281	0.01222	Lou	M	3.12128	-24.6648	FOR
Random	0	0.0804911	0.042292	Jody	M	3.40083	-25.5387	FOR
Random	0	0.445091	0.0232727	Phantom	M	1.41104	-29.1431	FOR
Random	0	0.14526	0.0168196	Bridget	F	2.85487	-26.0524	FOR
Random	0	0.678538	0.0712277	Jack	M	3	-28.9189	FOR
Random	0	0.548237	0.00092764	Bridget	F	3.21506	-28.7806	FOR
Random	0	0.613475	0	Jack	M	3.414	-28.0369	FOR
Random	0	0.439474	0.00263158	Jody	M	3.13649	-24.7874	FOR
Random	0	0.443182	0.0553977	Jack	M	2.84552	-25.5143	FOR
Random	0	0.374618	0.0198777	Phantom	M	3.02996	-24.3967	FOR
Random	0	0.525153	0.0404908	Lou	M	3.08706	-30.2273	FOR
Random	0	0.769553	0.0530726	Lou	M	2.04745	-27.3171	FOR
Random	0	0.344828	0.0111562	Jody	M	2.60519	-23.9965	FOR
Random	0	0.604938	0.0987654	Jody	M	3.36597	-29.1166	FOR
Random	0	0.618086	0.00175593	Jack	M	2.88983	-28.566	FOR
Random	0	0.214979	0.0166436	Sam	M	2.85458	-23.8556	FOR
Random	0	0.560193	0.0101054	Sam	M	3.17518	-30.3763	FOR
Random	0	0.321399	0.083808	Jack	M	3.16198	-23.3705	FOR
Random	0	0.511135	0.00212089	Phantom	M	2.85396	-28.7273	FOR
Random	0	0.619835	0.0181818	Sam	M	3.1877	-30.8357	FOR
Random	0	0.321627	0.012939	Bridget	F	2.05112	-25.2739	FOR
Random	0	0.469828	0.00107759	Phantom	M	3.20982	-29.5958	FOR
Random	0	0.465476	0.0428571	Bridget	F	3.03084	-28.6535	FOR
Random	0	0.400476	0.00634417	Helen	F	3.40267	-29.4138	FOR
Random	0	0	0.0224321	Bridget	F	2.9798	-31.2826	FOR
Random	0	0.585748	0.0140955	Jody	M	2.81064	-30.281	FOR
Random	0	0.785185	0.0481482	Jody	M	1.81282	-29.6502	FOR
Random	0	0.381423	0.0286561	Jack	M	2.77529	-25.2957	FOR
Random	0	0.300153	0.0137825	Helen	F	3.03058	-30.4178	FOR
Random	0	0.548234	0.00210859	Jack	M	3.3423	-29.3655	FOR
Random	0	0.357724	0.0127758	Jack	M	3.22163	-24.7391	FOR
Random	0	0.544032	0.0254925	Jody	M	3.29337	-30.3297	FOR
Random	0	0.255675	0.0250896	Phantom	M	3.28269	-29.351	FOR
Random	0	0.656	0.065	Jody	M	2.9381	-29.4142	FOR
Random	0	0.757299	0.0337591	Jody	M	3.33072	-21.0152	FOR
Random	0	0.595281	0.0453721	Phantom	M	3.2459	-30.3088	FOR
Random	0	0.465211	0.0627558	Helen	F	3.06526	-26.9272	FOR
Random	0	0.493743	0.00796359	Phantom	M	3.406	-29.2204	FOR
Random	0	0.656652	0.0386266	Edna	F	3.39223	-28.3472	FOR
Random	0	0.338907	0.0100334	Bridget	F	2.94105	-23.5725	FOR
Random	0	1.1134	0.0652921	Phantom	M	3.04177	-30.7792	FOR
Random	0	0.209567	0.0546697	Phantom	M	2.66675	-24.3984	FOR
Random	0	0.546814	0.0177285	Lou	M	2.80285	-28.8998	FOR
Random	0	0.114334	0.156997	Jody	M	3.28448	-28.6304	FOR
Random	0	0.187835	0.00178891	Bridget	F	2.82054	-27.2789	FOR
Random	0	0.313012	0.0254777	Edna	F	3.14782	-24.9854	FOR
Random	0	0.502547	0.0373514	Jack	M	3.12715	-24.1376	FOR
Random	0	0.35249	0.01341	Lou	M	3.02857	-28.6203	FOR
Random	0	0.569805	0.00324675	Edna	F	2.4736	-24.9808	FOR
Random	0	0.475152	0.0230303	Jody	M	3.4141	-30.1092	FOR
Random	0	0.398482	0.0142315	Bridget	F	3.04765	-29.1767	FOR
Random	0	0.258166	0.0358272	Phantom	M	3.02829	-24.5415	FOR
Random	0	0.60662	0.026098	Edna	F	3.0035	-30.6278	FOR
Random	0	0.691651	0.0255942	Edna	F	2.87727	-28.7766	FOR
Random	0	0.64	0.0321739	Phantom	M	3.39237	-22.9163	FOR
Random	0	0.250667	0.0773333	Jody	M	3.15533	-28.7751	FOR
Random	0	0.29476	0.0131004	Jody	M	2.96676	-28.7744	FOR
Random	0	0.567965	0.0859662	Jody	M	3.40495	-24.1399	FOR
Random	0	0.540975	0.00885936	Lou	M	3.41212	-28.7365	FOR
Random	0	0.617671	0.0437655	Bridget	F	3.24474	-29.4472	FOR
Random	0	0.647482	0.115907	Jody	M	3.1831	-27.2944	FOR
Random	0	0.684305	0.0493274	Sam	M	2.38731	-27.0689	FOR
Random	0	0.491489	0.00531915	Lou	M	2.79896	-27.0614	FOR
Random	0	0.408922	0.00092937	Sam	M	2.80404	-27.957	FOR
Random	0	0.421769	0.0728863	Sam	M	3.19756	-24.2016	FOR
Random	0	0.0382862	0.00182315	Helen	F	3.18941	-30.4473	FOR
Random	0	0.418221	0.0129125	Edna	F	3.37376	-25.763	FOR
Random	0	0.332143	0.0119048	Phantom	M	3.0793	-24.9084	FOR
Random	0	0.448136	0.0122034	Sam	M	3.16902	-27.6719	FOR
Random	0	0.739623	0.0264151	Jody	M	3.40771	-25.1404	FOR
Random	0	0.8944	0.02	Jack	M	2.98049	-23.5598	FOR
Random	0	0.692132	0.0193843	Bridget	F	2.86268	-28.8357	FOR
Random	0	0.76514	0.0442338	Bridget	F	2.70738	-25.7905	FOR
Random	0	0.510284	0.0509305	Edna	F	3.05954	-23.8346	FOR
Random	0	0.696734	0.00855365	Sam	M	3.4142	-29.2427	FOR
Random	0	0.169231	0.0355769	Lou	M	2.94494	-24.5924	FOR
Random	0	0.847156	0.0485782	Lou	M	2.92121	-22.6393	FOR
Random	0	0.586047	0.00872093	Jack	M	3.14152	-28.6005	FOR
Random	0	0.274298	0.0194384	Phantom	M	3.01071	-23.8783	FOR
Random	0	0.429724	0.0495392	Edna	F	3.02707	-30.2034	FOR
Random	0	0.728758	0.0245098	Helen	F	3.00387	-23.337	FOR
Random	0	0.0151515	0.0108225	Phantom	M	3.09199	-30.4226	FOR
Random	0	0.635569	0.0466472	Helen	F	3.2199	-29.5156	FOR
Random	0	0.501244	0	Phantom	M	3.11894	-28.4324	FOR
Random	0	0.502554	0.0214505	Helen	F	2.9615	-28.4654	FOR
Random	0	0.312117	0.0322086	Phantom	M	3.37415	-29.3747	FOR
Random	0	0.477311	0.0159664	Phantom	M	3.15594	-24.7335	FOR
Random	0	0.495737	0.0742996	Helen	F	2.86025	-24.7525	FOR
Random	0	0.58062	0.128674	Helen	F	3.25803	-24.574	FOR
Random	0	0.375	0.00344037	Phantom	M	2.93678	-29.2298	FOR
Random	0	0.581791	0.0621762	Bridget	F	3.03554	-22.3931	FOR
Random	0	0.750225	0.00450857	Edna	F	3.08416	-22.9406	FOR
Random	0	0.588608	0	Helen	F	2.99577	-25.1855	FOR
Random	0	0.440495	0.231839	Jody	M	2.88306	-27.3985	FOR
Random	0	0.545331	0.00954329	Edna	F	3.39511	-30.0399	FOR
Random	0	0.577872	0.00851064	Phantom	M	3.02014	-29.5065	FOR
Random	0	0.637184	0.0126354	Jody	M	1.62129	-29.0311	FOR
Random	0	0.537872	0.00255319	Lou	M	3.22502	-27.556	FOR
Random	0	0.37233	0.0132248	Lou	M	3.37332	-29.7062	FOR
Random	0	0.379613	0.0667838	Bridget	F	3.39873	-24.7916	FOR
Random	0	0.563845	0.010043	Bridget	F	3.08152	-28.5733	FOR
Random	0	0	0.0034188	Helen	F	3.3511	-24.9773	FOR
Random	0	0.538369	0	Bridget	F	3.24343	-27.3873	FOR
Random	0	0.516483	0.0100733	Lou	M	3.13483	-23.311	FOR
Random	0	0.544776	0.0223881	Lou	M	3.08203	-24.8206	FOR
Random	0	0.736174	0.0208522	Jody	M	3.39491	-22.7102	FOR
Random	0	0.465228	0.00319744	Bridget	F	3.01659	-28.4797	FOR
Random	0	0.57649	0.00402576	Lou	M	3.15718	-26.2982	FOR
Random	0	0.359779	0.0267528	Helen	F	3.15522	-26.4983	FOR
Random	0	0.674715	0.0221328	Jody	M	1.57627	-25.17	FOR
Random	0	0.474923	0.00409417	Phantom	M	2.99378	-29.7393	FOR
Random	0	0.541784	0.0117779	Lou	M	3.23745	-25.0239	FOR
Random	0	0.755779	0.0201005	Jody	M	2.70218	-24.5765	FOR
Random	0	0.329268	0	Edna	F	2.82128	-27.8959	FOR
Random	0	0.0371471	0.1263	Jody	M	3.05249	-30.2666	FOR
Random	0	0.195322	0.0163743	Jack	M	2.95824	-23.535	FOR
Random	0	0.426534	0.0356633	Edna	F	2.46233	-30.7749	FOR
Random	0	0.496306	0.0120887	Helen	F	3.41011	-28.4706	FOR
Random	0	0.401972	0.0536692	Helen	F	3.29037	-25.5999	FOR
Random	0	0.515179	0.04375	Sam	M	3.07884	-27.084	FOR
Random	0	0.435841	0.0719027	Edna	F	2.66141	-28.979	FOR
Random	0	0.446809	0.0118203	Lou	M	2.95882	-29.8059	FOR
Random	0	0.628198	0.00454804	Helen	F	3.28224	-28.0984	FOR
Random	0	0.566265	0	Phantom	M	3.29917	-25.5732	FOR
Random	0	0.434295	0.00080128	Phantom	M	3.06475	-29.0116	FOR
Random	0	0.634286	0.0971429	Lou	M	2.62225	-28.1234	FOR
Random	0	0.64011	0.00824176	Jody	M	2.12404	-23.6335	FOR
Random	0	0.508785	0.00687548	Edna	F	3.16264	-29.8471	FOR
Random	0	0.652751	0.0474383	Lou	M	3.37003	-26.8949	FOR
Random	0	0.564815	0.0154321	Edna	F	3.39343	-27.5814	FOR
Random	0	0.168524	0.0208914	Phantom	M	2.64973	-30.7866	FOR
Random	0	0	0	Jack	M	3.02187	-31.079	FOR
Random	0	0.507508	0.012012	Sam	M	2.51726	-28.4085	FOR
Random	0	0.227397	0.0232877	Helen	F	3.30282	-29.7326	FOR
Random	0	0.658378	0.00324324	Helen	F	3.22889	-29.382	FOR
Random	0	0.59189	0.00523218	Phantom	M	3.1426	-24.7796	FOR
Random	0	0.536325	0.0673077	Jack	M	2.05705	-28.5087	FOR
Random	0	0.225564	0.087218	Lou	M	3.21566	-30.4049	FOR
Random	0	0.426375	0.0210356	Phantom	M	2.02571	-24.5572	FOR
Random	0	0.206024	0.00120482	Phantom	M	3.16347	-24.6892	FOR
Random	0	0.692175	0.0696475	Sam	M	3.18931	-28.2061	FOR
Random	0	0.389948	0.00519931	Sam	M	3.40619	-24.6789	FOR
Random	0	0.727564	0.0235043	Lou	M	3.13737	-28.238	FOR
Random	0	0.8678	0.0254958	Bridget	F	2.8672	-23.7971	FOR
Random	0	0.462886	0.0183486	Phantom	M	3.33926	-28.9481	FOR
Random	0	0.533573	0.00359712	Phantom	M	3.04136	-28.937	FOR
Random	0	0.231884	0.0461133	Phantom	M	2.94883	-24.5068	FOR
Random	0	0.3192	0.0072	Lou	M	2.49219	-24.248	FOR
Random	0	0.644628	0.0123967	Lou	M	2.96481	-25.28	FOR
Random	0	0.415859	0.00969163	Phantom	M	3.17993	-25.2728	FOR
Random	0	0.651243	0.0291345	Lou	M	3.2321	-29.7046	FOR
Random	0	0.544643	0.014881	Phantom	M	2.79214	-29.0139	FOR
Random	0	0.460169	0.0516949	Jack	M	2.74042	-29.5236	FOR
Random	0	0.706801	0.00919118	Edna	F	3.07229	-23.4149	FOR
Random	0	0.211774	0.0466067	Bridget	F	2.84852	-30.3836	FOR
Random	0	0.486232	0.00335796	Phantom	M	2.96135	-28.5534	FOR
Random	0	0.225543	0.00634058	Helen	F	3.17341	-26.8541	FOR
Random	0	0.412022	0.0251366	Edna	F	3.02142	-24.3476	FOR
Random	0	0.452111	0.00720906	Jody	M	3.17192	-29.2734	FOR
Random	0	0.518943	0.00176211	Helen	F	2.64373	-28.5487	FOR
Random	0	0.607487	0.00213904	Phantom	M	3.04938	-28.8588	FOR
Random	0	0.484103	0	Sam	M	3.17022	-24.3896	FOR
Random	0	0.446927	0.0027933	Phantom	M	3.16256	-26.6481	FOR
Random	0	0.597176	0.00083057	Bridget	F	3.21847	-29.1179	FOR
Random	0	0.424565	0.0251451	Helen	F	3.17895	-24.8173	FOR
Random	0	0.56576	0.0578231	Jody	M	2.27781	-24.0291	FOR
Random	0	0.70316	0.0575621	Helen	F	3.0363	-27.293	FOR
Random	0	0.482759	0	Phantom	M	3.02336	-24.8442	FOR
Random	0	0.649043	0.0364631	Jack	M	3.38911	-29.0193	FOR
Random	0	0.348471	0.0139018	Phantom	M	3.05553	-26.9014	FOR
Random	0	0.626876	0.0491132	Jody	M	2.09128	-21.9352	FOR
Random	0	0.628982	0.0649594	Lou	M	2.91698	-22	FOR
Random	0	0.565043	0.0126751	Phantom	M	3.2441	-26.2753	FOR
Random	0	0.600166	0.00827815	Bridget	F	2.72932	-25.951	FOR
Random	0	0.258621	0.00095785	Sam	M	3.33089	-24.3638	FOR
Random	0	0.357591	0.0100376	Phantom	M	3.41421	-25.5049	FOR
Random	0	0.413752	0.115802	Jody	M	1.82254	-29.1964	FOR
Random	0	0.522152	0.0450949	Edna	F	3.19619	-25.8803	FOR
Random	0	0.584699	0.0211749	Jack	M	3.08768	-25.7859	FOR
Random	0	0.51583	0.00540541	Bridget	F	3.14427	-30.2851	FOR
Random	0	0.467687	0.0212585	Lou	M	3.01435	-24.9879	FOR
Random	0	0.454616	0.0271528	Jack	M	2.02371	-26.411	FOR
Random	0	0.643295	0.00876424	Phantom	M	3.06987	-28.3105	FOR
Random	0	0.535714	0.0567602	Sam	M	2.25937	-24.7367	FOR
Random	0	0.623108	0.0573705	Edna	F	3.24151	-30.1147	FOR
Random	0	0.613548	0.0375244	Helen	F	2.4606	-22.3632	FOR
Random	0	0.73399	0.0302604	Phantom	M	3.39873	-25.5473	FOR
Random	0	0.52381	0.00857143	Bridget	F	3.24473	-28.1852	FOR
Random	0	0.510439	0.037437	Phantom	M	3.27131	-23.3149	FOR
Random	0	0.52439	0.00166297	Phantom	M	3.11929	-28.5254	FOR
Random	0	0.473077	0.00769231	Edna	F	2.87426	-29.4196	FOR
Random	0	0.63451	0.0556863	Sam	M	3.10228	-28.9069	FOR
Random	0	0.552239	0.0646766	Phantom	M	3.3589	-23.8806	FOR
Random	0	0.59713	0.00165563	Jack	M	3.15669	-29.2178	FOR
Random	0	0.322086	0.00153374	Sam	M	2.65813	-23.1691	FOR
Random	0	0.662001	0.0510847	Phantom	M	2.08668	-29.5623	FOR
Random	0	0.396858	0.00136612	Edna	F	3.14115	-29.1716	FOR
Random	0	0.603723	0.0831117	Sam	M	2.86141	-27.3014	FOR
Random	0	0.49034	0.00466356	Helen	F	2.59869	-24.782	FOR
Random	0	0.582306	0.116026	Helen	F	1.17164	-25.0564	FOR
Random	0	0.393826	0	Sam	M	3.35536	-28.6697	FOR
Random	0	0.686037	0.0500404	Phantom	M	2.98972	-29.0204	FOR
Random	0	0.587639	0.0547112	Sam	M	3.06836	-27.4345	FOR
Random	0	0.477157	0.00253807	Jody	M	3.04747	-27.5012	FOR
Random	0	0.426257	0.00085251	Bridget	F	2.66411	-29.3916	FOR
Random	0	0.51281	0.0104998	Lou	M	3.03291	-25.61	FOR
Random	0	0.596887	0.00622568	Jack	M	2.86262	-26.6095	FOR
Random	0	0.366242	0	Bridget	F	3.02312	-25.3286	FOR
Random	0	0.436003	0.00082576	Helen	F	3.41335	-27.9017	FOR
Random	0	0.375291	0	Jody	M	3.03455	-21.3073	FOR
Random	0	0.657558	0.0256191	Jody	M	3.39893	-27.0958	FOR
Random	0	0.348073	0.0181406	Lou	M	2.75272	-27.444	FP
Random	0	0.00355872	0.00711744	Phantom	M	2.51777	-23.8144	FP
Random	0	0.192029	0.00181159	Bridget	F	3.11869	-23.0889	FP
Random	0	0.00121359	0	Helen	F	3.39841	-23.9124	FP
Random	0	0.771881	0.026878	Lou	M	2.88422	-28.4445	FP
Random	0	0.0821918	0.0639269	Bridget	F	2.659	-23.433	FP
Random	0	0.327536	0.00289855	Jody	M	2.78474	-25.7162	FP
Random	0	0.225754	0.0260799	Jack	M	2.98057	-29.2728	FP
Random	0	0.4334	0.026839	Phantom	M	3.15355	-25.8565	FP
Random	0	0.186856	0.132732	Jack	M	3.38204	-28.2721	FP
Random	0	0.411405	0.00203666	Edna	F	3.23004	-23.3797	FP
Random	0	0	0.00121951	Lou	M	2.62098	-27.8498	FP
Random	0	0.25	0.00581395	Sam	M	2.86461	-23.7909	FP
Random	0	0.0893372	0	Phantom	M	3.29171	-24.3869	FP
Random	0	0.476019	0	Bridget	F	1.57351	-26.7695	FP
Random	0	0.0263158	0.00114416	Jody	M	2.90842	-23.0918	FP
Random	0	0.135043	0.0119658	Lou	M	2.7861	-23.7868	FP
Random	0	0.155828	0.0429448	Phantom	M	2.94808	-23.4271	FP
Random	0	0.493459	0.00508721	Lou	M	2.90528	-24.338	FP
Random	0	0.365591	0.00119474	Jody	M	3.14807	-24.1586	FP
Random	0	0.158889	0.00555556	Bridget	F	2.6058	-24.359	FP
Random	0	0.00826446	0.00206612	Phantom	M	3.03506	-25.5384	FP
Random	0	0.00182149	0	Helen	F	3.21508	-25.4594	FP
Random	0	0.233485	0.130979	Jody	M	2.80189	-28.3403	FP
Random	0	0.00212089	0.00848356	Lou	M	3.06426	-29.2278	FP
Random	0	0.0093985	0.0018797	Lou	M	3.38162	-26.5679	FP
Random	0	0.00712106	0.263479	Lou	M	3.05857	-29.2537	FP
Random	0	0	0	Helen	F	3.30687	-27.9726	FP
Random	0	0.0362622	0	Edna	F	2.59876	-25.2683	FP
Random	0	0.397351	0.00946074	Jack	M	2.50951	-24.1119	FP
Random	0	0	0	Lou	M	2.91981	-25.4854	FP
Random	0	0.0301974	0.0174216	Sam	M	3.01001	-24.0472	FP
Random	0	0.594737	0	Bridget	F	2.96876	-25.3589	FP
Random	0	0.0681537	0.224287	Jody	M	2.88179	-28.3269	FP
Random	0	0.517068	0.00702811	Edna	F	3.31231	-21.0754	FP
Random	0	0.253853	0.00271986	Helen	F	3.12864	-25.9072	FP
Random	0	0.00140647	0	Helen	F	2.59574	-24.4815	FP
Random	0	0.689516	0.0413306	Sam	M	3.37423	-28.189	FP
Random	0	0.819116	0	Edna	F	1.74522	-24.5122	FP
Random	0	0	0	Phantom	M	3.39727	-23.1496	FP
Random	0	0.127031	0	Sam	M	2.76625	-21.6713	FP
Random	0	0.137203	0.00263852	Jody	M	2.95837	-21.4224	FP
Random	0	0.468571	0	Helen	F	2.25268	-22.2547	FP
Random	0	0.0943571	0	Lou	M	2.44904	-27.1673	FP
Random	0	0	0	Helen	F	2.83617	-25.1627	FP
Random	0	0	0	Sam	M	3.38625	-27.0272	FP
Random	0	0	0	Phantom	M	3.38555	-27.7103	FP
Random	0	0	0	Lou	M	2.12758	-27.3374	FP
Random	0	0	0	Phantom	M	3.41165	-26.4277	FP
Random	0	0	0	Jack	M	2.92529	-30.8536	HW
Random	0	0.381013	0.021519	Sam	M	3.41216	-30.0451	HW
Random	0	0	0	Helen	F	3.02492	-30.683	HW
Random	0	0	0.0107239	Jody	M	3.11032	-31.3214	HW
Random	0	0	0.00843373	Sam	M	3.30524	-31.154	HW
Random	0	0.548951	0.0181818	Jody	M	3.14757	-29.8471	HW
Random	0	0.206186	0.00441826	Lou	M	2.96177	-30.6853	HW
Random	0	0.432248	0.0439061	Jack	M	3.32687	-30.6231	HW
Random	0	0	0	Lou	M	3.31798	-31.0256	HW
Random	0	0	0.0109718	Lou	M	2.78273	-31.2741	HW
Random	0	0	0	Lou	M	3.01956	-30.5442	HW
Random	0	0	0.0423529	Helen	F	2.98513	-31.3755	HW
Random	0	0	0	Bridget	F	2.89246	-30.7135	HW
Random	0	0	0.0222717	Edna	F	2.82584	-31.4091	HW
Random	0	0	0.0263158	Jody	M	3.32332	-31.3825	HW
Random	0	0	0	Helen	F	3.0907	-30.4779	HW
Random	0	0.473054	0.0502994	Helen	F	1.46399	-30.1194	HW
Random	0	0.00124844	0.00374532	Jody	M	3.19617	-30.4557	HW
Random	0	0	0.00578871	Bridget	F	2.74313	-30.6446	HW
Random	0	0	0	Helen	F	2.85437	-31.1169	HW
Random	0	0.657483	0.0014892	Phantom	M	1.16731	-29.765	HW
Random	0	0	0.011734	Sam	M	3.05964	-31.4335	HW
Random	0	0	0.0315068	Bridget	F	3.03539	-30.6521	HW
Random	0	0	0	Edna	F	3.14204	-30.9563	HW
Random	0	0	0.00791855	Helen	F	3.0214	-30.4262	HW
Random	0	0	0	Phantom	M	2.94344	-31.5543	HW
Random	0	0	0.00286533	Bridget	F	3.21409	-30.8319	HW
Random	0	0	0.00132979	Helen	F	2.91807	-31.0425	HW
Random	0	0	0.00145773	Sam	M	2.89206	-31.5389	HW
Random	0	0	0	Jody	M	3.14313	-31.2507	HW
Random	0	0	0.00696864	Sam	M	3.35827	-31.4078	HW
Random	0	0	0	Bridget	F	3.27097	-30.9648	HW
Random	0	0	0	Helen	F	2.53962	-30.8877	HW
Random	0	0	0.00181818	Helen	F	3.26547	-31.0209	HW
Random	0	0	0.012987	Lou	M	2.94689	-31.4121	HW
Random	0	0	0.00304878	Phantom	M	2.25185	-30.9841	HW
Random	0	0	0.190476	Jack	M	2.68279	-31.0734	HW
Random	0	0	0	Helen	F	3.30974	-30.8659	HW
Random	0	0	0.00162338	Jack	M	3.07849	-31.2981	HW
Random	0	0	0.00145985	Lou	M	3.04088	-31.1324	HW
Random	0	0	0.00444444	Edna	F	3.01484	-30.5134	HW
Random	0	0	0	Helen	F	2.52635	-30.994	HW
Random	0	0	0	Edna	F	2.85525	-30.9847	HW
Random	0	0	0.0121622	Phantom	M	2.75329	-30.7263	HW
Random	0	0	0.322148	Jack	M	3.15764	-31.8723	HW
Random	0	0	0.0106762	Helen	F	3.05369	-31.0875	HW
Random	0	0	0.00659341	Lou	M	2.82443	-32.0818	HW
Random	0	0	0.0396419	Jack	M	2.71588	-31.055	HW
Random	0	0	0.0269841	Phantom	M	3.23483	-31.4027	HW
Random	0	0	0.00296736	Phantom	M	3.24763	-30.7493	HW
Random	0	0	0	Bridget	F	3.23024	-31.3054	HW
Random	0	0	0.0019802	Sam	M	2.58604	-31.1925	HW
Random	0	0	0	Bridget	F	3.0478	-30.5303	HW
Random	0	0.0116448	0.229985	Jody	M	3.06555	-29.8114	HW
Random	0	0	0	Helen	F	2.30468	-31.584	HW
Random	0	0	0.0287081	Edna	F	3.32999	-31.5803	HW
Random	0	0	0	Edna	F	3.18256	-31.1191	HW
Random	0	0	0	Jack	M	2.57292	-31.0912	HW
Random	0	0	0.0126382	Phantom	M	2.88791	-30.9589	HW
Random	0	0	0.0627451	Jody	M	3.02055	-31.4128	HW
Random	0	0	0.00879765	Sam	M	3.07298	-31.1658	HW
Random	0	0	0.0146252	Jack	M	3.24472	-30.8164	HW
Random	0	0	0	Phantom	M	3.26151	-30.5995	HW
Random	0	0	0.0622287	Phantom	M	3.24749	-31.8043	HW
Random	0	0	0.0049505	Phantom	M	2.81879	-30.8429	HW
Random	0	0	0	Lou	M	3.14745	-30.5624	HW
Random	0	0	0.0818182	Lou	M	2.95374	-31.5018	HW
Random	0	0	0.0197694	Jody	M	3.19012	-31.2383	HW
Random	0	0	0	Lou	M	3.11959	-30.8721	HW
Random	0	0	0	Sam	M	2.87908	-30.4591	HW
Random	0	0	0	Helen	F	2.80095	-31.2497	HW
Random	0	0	0.00165289	Sam	M	3.01586	-31.4636	HW
Random	0	0	0	Helen	F	2.96513	-31.2054	HW
Random	0	0.376505	0.00481464	Lou	M	2.51727	-30.6182	HW
Random	0	0	0	Edna	F	3.01075	-31.0613	HW
Random	0	0	0.00204499	Phantom	M	2.84746	-31.1615	HW
Random	0	0.588471	0.0136109	Jody	M	3.20291	-28.9447	HW
Random	0	0	0.182415	Jack	M	2.9065	-31.5059	HW
Random	0	0	0	Bridget	F	3.03653	-30.7095	HW
Random	0	0	0.00798403	Bridget	F	3.04999	-30.8829	HW
Random	0	0	0	Jack	M	3.12655	-31.1043	HW
Random	0	0	0	Sam	M	3.07152	-31.213	HW
Random	0	0	0.0549451	Jack	M	2.79732	-30.8265	HW
Random	0	0	0	Bridget	F	3.13473	-30.8236	HW
Random	0	0	0	Sam	M	3.05561	-31.1726	HW
Random	0	0	0.0130548	Jack	M	2.99971	-31.091	HW
Random	0	0	0	Lou	M	2.30247	-30.6102	HW
Random	0	0	0	Lou	M	2.5466	-31.2578	HW
Random	0	0	0.0291829	Phantom	M	3.06502	-31.4257	HW
Random	0	0	0.0357143	Edna	F	2.90919	-30.9791	HW
Random	0	0	0	Bridget	F	2.97011	-30.7786	HW
Random	0	0.282988	0.0290456	Sam	M	3.38542	-30.7047	HW
Random	0	0	0.011465	Helen	F	3.28862	-31.4244	HW
Random	0	0	0	Jack	M	2.91865	-30.7617	HW
Random	0	0	0	Helen	F	3.24362	-30.7734	HW
Random	0	0	0	Jody	M	3.04212	-30.5173	HW
Random	0	0	0	Lou	M	2.80426	-30.8699	HW
Random	0	0	0.00443131	Phantom	M	3.38798	-30.9641	HW
Random	0	0	0	Phantom	M	2.33558	-31.1687	HW
Random	0	0	0	Lou	M	3.26183	-30.6732	HW
Random	0	0	0	Bridget	F	2.91922	-30.6256	HW
Random	0	0	0	Jody	M	3.03448	-30.5602	HW
Random	0	0.391908	0.0115607	Lou	M	2.32356	-28.8204	HW
Random	0	0	0.00487013	Sam	M	3.15753	-31.5698	HW
Random	0	0.0947977	0	Edna	F	3.32385	-29.9269	HW
Random	0	0	0.00376648	Jody	M	3.08467	-30.7648	HW
Random	0	0	0	Sam	M	3.13288	-30.7941	HW
Random	0	0	0.130841	Bridget	F	3.37343	-31.2209	HW
Random	0	0.41599	0.0187383	Jody	M	2.34845	-29.1214	HW
Random	0	0	0	Lou	M	2.99496	-30.8022	HW
Random	0	0.00525624	0	Lou	M	3.02532	-30.7505	HW
Random	0	0	0.0034188	Helen	F	3.0597	-31.4764	HW
Random	0	0	0	Bridget	F	2.93836	-30.836	HW
Random	0	0	0	Jody	M	2.42142	-30.9103	HW
Random	0	0	0	Jody	M	3.19577	-31.1821	HW
Random	0	0	0	Sam	M	3.27442	-30.7633	HW
Random	0	0.166355	0.00560748	Jody	M	2.9953	-30.8122	HW
Random	0	0	0.00480307	Phantom	M	3.00703	-30.9367	HW
Random	0	0	0	Phantom	M	3.01551	-31.1073	HW
Random	0	0	0	Lou	M	3.15261	-31.2442	HW
Random	0	0	0	Phantom	M	2.54931	-31.0535	HW
Random	0	0	0.00127714	Phantom	M	3.34818	-31.0918	HW
Random	0	0	0.043662	Phantom	M	2.48095	-31.4016	HW
Random	0	0	0.0310192	Bridget	F	3.02611	-31.5199	HW
Random	0	0	0	Bridget	F	3.12002	-31.3632	HW
Random	0	0	0.0015625	Sam	M	3.03714	-30.9738	HW
Random	0	0	0.0059322	Edna	F	3.03041	-31.2887	HW
Random	0	0	0.0176211	Edna	F	2.8858	-31.3254	HW
Random	0	0	0.00091158	Helen	F	2.69813	-31.1466	HW
Random	0	0	0.00142857	Helen	F	2.9262	-30.7797	HW
Random	0	0.0327869	0.0068306	Phantom	M	3.41163	-30.672	HW
Random	0	0	0	Jody	M	2.72253	-30.6747	HW
Random	0	0	0	Lou	M	2.80855	-31.4659	HW
Random	0	0	0.00102459	Helen	F	2.43169	-31.4725	HW
Random	0	0	0	Jack	M	2.90445	-30.7461	HW
Random	0	0	0	Phantom	M	3.07076	-30.9629	HW
Random	0	0	0	Phantom	M	3.09032	-30.8588	HW
Random	0	0	0	Jack	M	3.13354	-31.0028	HW
Random	0	0.147518	0.012766	Sam	M	3.06988	-30.8225	HW
Random	0	0	0.00159236	Jody	M	3.01914	-30.8964	HW
Random	0	0	0.00263158	Helen	F	2.99821	-30.7091	HW
Random	0	0	0.00357654	Jack	M	2.7641	-30.9799	HW
Random	0	0	0.00534045	Helen	F	2.50502	-31.1059	HW
Random	0	0	0.249389	Bridget	F	3.40123	-31.6538	HW
Random	0	0	0.00265957	Jack	M	3.13905	-31.4034	HW
Random	0	0.253666	0.115836	Lou	M	2.6855	-30.7957	HW
Random	0	0	0.00115741	Phantom	M	2.97632	-31.2393	HW
Random	0	0	0.0108893	Bridget	F	3.05429	-31.4028	HW
Random	0	0	0.427481	Jody	M	3.11301	-31.4895	HW
Random	0	0	0.00425532	Bridget	F	2.75765	-30.9412	HW
Random	0	0	0.00280112	Phantom	M	3.24523	-30.8066	HW
Random	0	0	0	Helen	F	3.15969	-31.5677	HW
Random	0	0	0	Helen	F	2.76326	-30.7121	HW
Random	0	0	0.0444015	Sam	M	2.63238	-31.8436	HW
Random	0	0	0.00766284	Helen	F	2.97941	-31.0845	HW
Random	0	0.0110345	0.00827586	Phantom	M	3.34328	-30.3978	HW
Random	0	0	0	Phantom	M	2.99311	-31.0008	HW
Random	0	0	0.0124555	Jack	M	2.81874	-30.3467	HW
Random	0	0.480243	0.0486322	Lou	M	2.74985	-29.3616	HW
Random	0	0	0.017341	Helen	F	3.14477	-30.9992	HW
Random	0	0	0.0531136	Bridget	F	2.9501	-31.4029	HW
Random	0	0.0787037	0.100309	Sam	M	2.45829	-29.6878	HW
Random	0	0	0	Phantom	M	2.80595	-30.947	HW
Random	0	0	0	Bridget	F	3.15934	-31.1214	HW
Random	0	0.244444	0.0222222	Bridget	F	3.2005	-30.6947	HW
Random	0	0	0.0235081	Edna	F	2.95881	-31.417	HW
Random	0	0	0.0180723	Lou	M	3.05268	-30.9572	HW
Random	0	0	0.00443131	Edna	F	2.73655	-30.6519	HW
Random	0	0	0	Jody	M	3.12089	-30.9038	HW
Random	0	0	0	Sam	M	3.25766	-30.8524	HW
Random	0	0	0.0323834	Jack	M	3.04346	-31.1815	HW
Random	0	0	0.0015674	Jody	M	2.98946	-30.7534	HW
Random	0	0	0	Sam	M	2.93771	-30.6219	HW
Random	0	0.427739	0.0244755	Bridget	F	3.30783	-30.5144	HW
Random	0	0	0.0799087	Jack	M	3.28696	-31.3307	HW
Random	0	0	0.0180723	Edna	F	2.84393	-30.6274	HW
Random	0	0	0.0869565	Bridget	F	3.32359	-31.6609	HW
Random	0	0	0.00701754	Helen	F	2.84244	-31.0147	HW
Random	0	0	0	Lou	M	2.39313	-30.9691	HW
Random	0	0	0.0302013	Lou	M	3.40731	-31.0772	HW
Random	0	0	0	Helen	F	2.94069	-30.8821	HW
Random	0	0	0	Bridget	F	3.19417	-30.8645	HW
Random	0	0	0.0902474	Lou	M	2.98515	-31.0501	HW
Random	0	0	0.00423729	Jack	M	3.0338	-30.8474	HW
Random	0	0	0.00304414	Jody	M	3.21575	-31.3219	HW
Random	0	0	0	Lou	M	3.06399	-30.8988	HW
Random	0	0	0.00255428	Bridget	F	3.36085	-30.9672	HW
Random	0	0	0.0224551	Jack	M	3.04348	-31.2592	HW
Random	0	0	0	Helen	F	2.83664	-31.096	HW
Random	0	0	0.00343249	Jody	M	2.83524	-30.5944	HW
Random	0	0	0	Edna	F	2.96199	-30.7387	HW
Random	0	0	0	Sam	M	2.81974	-31.2172	HW
Random	0	0	0.00520833	Helen	F	2.97556	-30.6996	HW
Random	0	0	0.0137405	Phantom	M	2.69863	-31.0188	HW
Random	0	0	0.00791139	Helen	F	3.23878	-31.1487	HW
Random	0	0	0	Jack	M	3.01002	-31.0395	HW
Random	0	0	0	Helen	F	3.17667	-30.5429	HW
Random	0	0	0	Lou	M	3.02673	-30.7205	HW
Random	0	0	0.0263566	Edna	F	1.63001	-31.5668	HW
Random	0	0	0.013468	Helen	F	3.18696	-31.579	HW
Random	0	0	0	Helen	F	2.7876	-30.663	HW
Random	0	0	0	Helen	F	2.93068	-30.641	HW
Random	0	0	0.00132626	Bridget	F	3.20955	-30.7773	HW
Random	0	0	0	Jack	M	3.05301	-30.5433	HW
Random	0	0.414596	0.107143	Lou	M	2.89042	-29.6324	HW
Random	0	0	0	Helen	F	3.17101	-31.1186	HW
Random	0	0	0	Helen	F	2.76402	-30.7651	HW
Random	0	0.566301	0.0348953	Phantom	M	1.77835	-30.5883	HW
Random	0	0	0	Bridget	F	3.10868	-31.3178	HW
Random	0	0	0	Phantom	M	3.07779	-31.805	HW
Random	0	0	0	Bridget	F	3.11725	-30.6866	HW
Random	0	0	0	Edna	F	2.44141	-31.0587	HW
Random	0	0.273006	0.0245399	Edna	F	3.39503	-32.1718	OW
Random	0	0	0.0142566	Phantom	M	2.91526	-31.5202	OW
Random	0	0	0.0146789	Bridget	F	3.02804	-31.5625	OW
Random	0	0	0.00312989	Sam	M	2.86936	-31.5215	OW
Random	0	0	0	Phantom	M	3.24653	-31.2599	OW
Random	0	0	0	Bridget	F	3.3144	-30.9071	OW
Random	0	0	0	Sam	M	2.89921	-31.9012	OW
Random	0	0	0.0100756	Sam	M	3.41392	-31.9278	OW
Random	0	0	0.0645161	Jody	M	3.18289	-31.4226	OW
Random	0	0	0.00868307	Phantom	M	3.09708	-31.4994	OW
Random	0	0	0.222222	Jack	M	2.71703	-31.5291	OW
Random	0	0	0.0015015	Bridget	F	3.0538	-31.3893	OW
Random	0	0	0	Bridget	F	3.00217	-31.918	OW
Random	0	0	0	Edna	F	3.00378	-31.5349	OW
Random	0	0	0.012024	Sam	M	3.18311	-31.4	OW
Random	0	0	0.00121951	Edna	F	3.26449	-32.0165	OW
Random	0	0	0.0342466	Phantom	M	2.81634	-32.1228	OW
Random	0	0	0.00393701	Bridget	F	3.12529	-31.9923	OW
Random	0	0	0.032872	Helen	F	3.02367	-31.4069	OW
Random	0	0	0.0826087	Phantom	M	2.94623	-31.3557	OW
Random	0	0	0	Lou	M	2.30099	-32.0687	OW
Random	0	0	0	Sam	M	2.96564	-31.3618	OW
Random	0	0	0.00817439	Jody	M	2.84917	-31.4545	OW
Random	0	0.371508	0.00977654	Lou	M	3.38216	-30.5262	OW
Random	0	0	0.00166113	Lou	M	2.97036	-31.4459	OW
Random	0	0	0.00470219	Phantom	M	2.88393	-31.5407	OW
Random	0	0.222989	0.00229885	Phantom	M	2.74231	-20.942	PS
Random	0	0.00974659	0.00584795	Phantom	M	3.127	-29.2864	PS
Random	0	0.00345224	0.00115075	Bridget	F	3.33095	-24.537	PS
Random	0	0.426624	0.0224539	Phantom	M	2.54931	-22.8989	PS
Random	0	0.278405	0.00075245	Edna	F	3.03526	-22.697	PS
Random	0	0.549946	0.0247046	Lou	M	2.68592	-22.1068	PS
Random	0	0.214784	0.0432357	Jody	M	3.32097	-22.0066	PS
Random	0	0.226361	0.0243553	Helen	F	2.83516	-29.2196	PS
Random	0	0.617807	0.0130293	Jack	M	2.32866	-22.985	PS
Random	0	0.393429	0.0130581	Phantom	M	2.96069	-25.8279	PS
Random	0	0.0014556	0.00291121	Edna	F	3.08947	-26.707	PS
Random	0	0.241913	0.00562588	Phantom	M	2.96003	-23.1226	PS
Random	0	0.0310982	0.00388727	Helen	F	3.29008	-23.7476	PS
Random	0	0.0800439	0	Phantom	M	2.95644	-23.3175	PS
Random	0	0	0.00234009	Sam	M	2.61985	-23.1131	PS
Random	0	0.135753	0.00268817	Helen	F	2.40341	-21.1936	PS
Random	0	0.358079	0.00582242	Jody	M	3.11758	-30.2157	PS
Random	0	0.264633	0.00741962	Phantom	M	2.98568	-29.1634	PS
Random	0	0.476143	0	Jody	M	2.87874	-25.8142	PS
Random	0	0.392662	0.0124902	Jody	M	2.66389	-24.0502	PS
Random	0	0.192875	0.0012285	Phantom	M	3.18049	-23.4784	PS
Random	0	0.0149701	0.0755988	Jack	M	3.19943	-30.317	PS
Random	0	0.0797941	0.005148	Bridget	F	1.83336	-28.0758	PS
Random	0	0.312891	0.0262829	Helen	F	2.63464	-23.2279	PS
Random	0	0.337398	0.00677507	Phantom	M	3.3416	-23.433	PS
Random	0	0.0250368	0.0338733	Jack	M	2.85351	-23.4123	PS
Random	0	0	0.0322581	Jody	M	2.59422	-27.8665	PS
Random	0	0.353297	0.00241984	Sam	M	2.99609	-24.3609	PS
Random	0	0.0103896	0.0415584	Lou	M	1.90378	-28.7621	PS
Random	0	0	0.0356083	Lou	M	3.40678	-29.0142	PS
Random	0	0.0162896	0.0253394	Sam	M	3.05414	-22.3038	PS
Random	0	0.507292	0.0885417	Jack	M	3.4137	-27.9745	PS
Random	0	0.0266535	0.0345508	Lou	M	2.70203	-24.9481	PS
Random	0	0.303838	0.00746269	Sam	M	2.12417	-26.1716	PS
Random	0	0.413821	0.00325203	Jody	M	3.26162	-22.5556	PS
Random	0	0.0805627	0.00127877	Phantom	M	3.21792	-24.4869	PS
Random	0	0.693745	0.038662	Phantom	M	2.51593	-23.9317	PS
Random	0	0.493559	0.00135593	Edna	F	3.09736	-26.3222	PS
Random	0	0	0.00112867	Jody	M	2.43251	-26.4772	PS
Random	0	0.296984	0.00812065	Bridget	F	3.03751	-29.3915	PS
Random	0	0.0348964	0	Lou	M	2.33331	-27.7047	PS
Random	0	0.230769	0.00744417	Jack	M	2.71001	-21.8133	PS
Random	0	0.0335622	0.00152555	Phantom	M	2.53538	-28.562	PS
Random	0	0.245823	0.00119332	Edna	F	2.4228	-22.8799	PS
Random	0	0.414958	0.0193004	Lou	M	2.92995	-24.8774	PS
Random	0	0.137412	0.0140421	Jack	M	1.9387	-27.589	PS
Random	0	0.346779	0.00662252	Phantom	M	3.04334	-23.2691	PS
Random	0	0.0773362	0.0107411	Bridget	F	3.26703	-23.427	PS
Random	0	0.244332	0.0100756	Edna	F	2.85732	-23.2331	PS
Random	0	0.414481	0.0178384	Phantom	M	2.5505	-29.087	PS
Random	0	0.438277	0.0107705	Edna	F	3.11921	-25.5082	PS
Random	0	0.191667	0.0583333	Edna	F	3.24106	-23.5516	PS
Random	0	0.0403423	0.0134474	Lou	M	2.94274	-25.1121	PS
Random	0	0.284545	0.00204708	Lou	M	2.51331	-22.6233	PS
Random	0	0.0157127	0.00112233	Edna	F	1.67974	-29.1056	PS
Random	0	0.363864	0.00376412	Helen	F	3.26399	-23.2217	PS
Random	0	0.00788644	0.0283912	Phantom	M	2.3	-26.1527	PS
Random	0	0.264386	0.00622084	Phantom	M	3.0126	-25.9762	PS
Random	0	0	0.0142119	Bridget	F	2.13898	-25.2241	PS
Random	0	0.398238	0	Phantom	M	3.22687	-26.5372	PS
Random	0	0.321145	0.00079491	Phantom	M	3.37935	-25.8384	PS
Random	0	0.410281	0.00872939	Phantom	M	2.69205	-24.0168	PS
Random	0	0.0272109	0.0419501	Edna	F	3.05452	-25.471	PS
Random	0	0.416854	0.0235955	Bridget	F	3.2563	-23.7043	PS
Random	0	0.426567	0.00187091	Jack	M	2.85997	-25.1039	PS
Random	0	0.364475	0.107266	Bridget	F	3.10012	-28.1094	PS
Random	0	0.520814	0.00277521	Helen	F	2.98047	-22.7306	PS
Random	0	0.265774	0.00764818	Edna	F	3.19281	-29.4334	PS
Random	0	0.404614	0.0328305	Sam	M	3.40295	-23.9088	PS
Random	0	0.335689	0.0936396	Bridget	F	3.3967	-29.8966	PS
Random	0	0.483215	0.00915565	Jody	M	1.80566	-26.5353	PS
Random	0	0.145119	0.0316623	Sam	M	2.49621	-21.5901	PS
Random	0	0.00291971	0.0116788	Sam	M	2.70111	-24.5331	PS
Random	0	0.243056	0.00694444	Jack	M	2.74223	-29.104	PS
Random	0	0.0870166	0.00138122	Lou	M	2.94365	-24.9904	PS
Random	0	0.571207	0.0108359	Phantom	M	3.0418	-27.3742	PS
Random	0	0.125174	0.00834492	Edna	F	3.10477	-21.7996	PS
Random	0	0.273026	0.00328947	Helen	F	3.20844	-22.6505	PS
Random	0	0.430958	0.0077951	Phantom	M	2.344	-27.7346	PS
Random	0	0.361531	0.0151057	Edna	F	3.27871	-25.404	PS
Random	0	0	0.00405405	Jody	M	1.22924	-21.8253	PS
Random	0	0.403114	0.00086505	Sam	M	2.42214	-28.973	PS
Random	0	0.027451	0.0183007	Bridget	F	2.99804	-25.4788	PS
Random	0	0.353153	0.0036036	Phantom	M	2.28418	-25.0039	PS
Random	0	0.00260417	0.0390625	Jody	M	2.05775	-25.2053	PS
Random	0	0.276995	0.00586854	Jody	M	3.18875	-24.4868	PS
Random	0	0.270419	0	Sam	M	3.20515	-21.9668	PS
Random	0	0.647318	0.0474934	Lou	M	2.85631	-23.5437	PS
Random	0	0.189333	0.0666667	Phantom	M	3.38417	-23.6136	PS
Random	0	0.268908	0.0060024	Phantom	M	3.02793	-23.9669	PS
Random	0	0.105438	0.0210877	Jody	M	2.95566	-26.4383	PS
Random	0	0.438441	0.00177148	Phantom	M	3.1961	-27.2175	PS
Random	0	0.272727	0.0575139	Jack	M	3.30715	-25.7709	PS
Random	0	0.0862588	0.0100301	Edna	F	2.85881	-25.0058	PS
Random	0	0	0.0285401	Lou	M	3.05058	-31.4615	PS
Random	0	0	0.00461538	Sam	M	3.26886	-23.0923	PS
Random	0	0.0921273	0	Lou	M	3.13018	-26.5902	PS
Random	0	0.00827423	0.0177305	Edna	F	3.15105	-21.1498	PS
Random	0	0.584463	0.0776874	Sam	M	3.01478	-27.1229	PS
Random	0	0.108456	0.00183824	Jody	M	2.55636	-26.6317	PS
Random	0	0.416087	0.0119166	Edna	F	3.39891	-29.5197	PS
Random	0	0.3382	0.00364964	Jody	M	2.98824	-23.9872	PS
Random	0	0.249289	0.00758294	Edna	F	2.98614	-24.9824	PS
Random	0	0.370474	0.0292479	Sam	M	2.60689	-24.316	PS
Random	0	0.249455	0	Jody	M	3.1197	-24.2095	PS
Random	0	0	0	Edna	F	2.98499	-26.1319	PS
Random	0	0.237978	0.00123305	Sam	M	3.04908	-23.6609	PS
Random	0	0.262128	0.00510638	Jody	M	2.69035	-23.0646	PS
Random	0	0.381062	0	Edna	F	2.80802	-24.1047	PS
Random	0	0.248047	0.00195313	Lou	M	3.28455	-28.6779	PS
Random	0	0.303922	0	Lou	M	3.2929	-24.8198	PS
Random	0	0.363029	0.00111359	Lou	M	3.39658	-24.9717	PS
Random	0	0.268577	0.0116773	Phantom	M	1.78477	-23.4694	PS
Random	0	0.298831	0.00834725	Phantom	M	2.34218	-26.3596	PS
Random	0	0.315301	0.00618238	Jody	M	3.16054	-24.0129	PS
Random	0	0	0	Jack	M	3.03307	-31.3634	PS
Random	0	0.650475	0.0443506	Phantom	M	3.40881	-27.2111	PS
Random	0	0.843478	0.0173913	Bridget	F	3.14664	-23.5108	PS
Random	0	0.518797	0.0123035	Helen	F	3.33175	-23.6026	PS
Random	0	0.606811	0.00103199	Edna	F	1.58356	-23.1226	PS
Random	0	0.214623	0.00353774	Helen	F	2.90818	-23.4175	PS
Random	0	0.327515	0.00410678	Helen	F	2.61105	-24.8927	PS
Random	0	0.609105	0.0188383	Helen	F	3.36806	-27.923	PS
Random	0	0.0572917	0.00173611	Jack	M	3.32617	-23.4144	PS
Random	0	0.240339	0.00754006	Helen	F	3.08555	-23.4919	PS
Random	0	0.249374	0.0483736	Phantom	M	2.71182	-30.0578	PS
Random	0	0.277277	0.011011	Edna	F	3.36051	-29.158	PS
Random	0	0.20463	0.0157407	Jack	M	2.97433	-23.3177	PS
Random	0	0.656913	0.00146306	Phantom	M	2.86849	-23.7377	PS
Random	0	0.239297	0.00109769	Jody	M	3.33031	-24.0915	PS
Random	0	0.19026	0.00226501	Jack	M	3.1946	-23.7022	PS
Random	0	0.0948367	0.0105374	Phantom	M	2.85677	-29.0386	PS
Random	0	0.346786	0	Phantom	M	1.53007	-22.3199	PS
Random	0	0.279348	0.00217391	Lou	M	3.03064	-23.4888	PS
Random	0	0.263415	0.00853659	Phantom	M	3.31891	-23.9486	PS
Random	0	0.231858	0.00176991	Phantom	M	3.22482	-28.9487	PS
Random	0	0.31636	0.00866739	Jack	M	2.39443	-26.3521	PS
Random	0	0.484996	0.0137875	Phantom	M	2.69033	-26.3584	PS
Random	0	0.313609	0.00739645	Jody	M	3.07011	-29.7465	PS
Random	0	0.251018	0.0108548	Jack	M	2.49446	-27.1667	PS
Random	0	0.744521	0.0575342	Bridget	F	2.57113	-26.9497	PS
Random	0	0.305851	0.0301418	Helen	F	3.02746	-24.328	PS
Random	0	0.179002	0.00516351	Jack	M	3.20401	-23.3672	PS
Random	0	0.229921	0.00629921	Phantom	M	2.90708	-23.4482	PS
Random	0	0.360526	0	Helen	F	2.53187	-25.0626	PS
Random	0	0.552658	0.00100301	Edna	F	2.657	-23.404	PS
Random	0	0.406757	0	Lou	M	3.22448	-24.7482	PS
Random	0	0.176879	0.00462428	Phantom	M	3.22862	-21.2095	PS
Random	0	0.32598	0.00490196	Sam	M	3.13558	-29.1288	PS
Random	0	0.430769	0.0180995	Phantom	M	3.10467	-24.2083	PS
Random	0	0	0.0030303	Jody	M	3.19135	-22.6055	PS
Random	0	0.259644	0.00148368	Lou	M	2.1974	-23.3718	PS
Random	0	0.240741	0.00462963	Jack	M	1.97152	-23.8762	PS
Random	0	0.537463	0.021978	Jack	M	1.92378	-26.1209	PS
Random	0	0.643434	0.0205429	Sam	M	3.14634	-27.9018	PS
Random	0	0.259873	0.066242	Bridget	F	2.74099	-23.6919	PS
Random	0	0.44464	0.0105448	Jody	M	3.10344	-26.8632	PS
Random	0	0.251397	0.0437616	Helen	F	2.00915	-22.7854	PS
Random	0	0.324495	0.00883838	Lou	M	3.28074	-26.1359	PS
Random	0	0.0208333	0.0486111	Lou	M	3.24337	-25.2319	PS
Random	0	0.202232	0.0055788	Phantom	M	2.70632	-21.5209	PS
Random	0	0.328622	0.0120141	Edna	F	2.9456	-22.7745	PS
Random	0	0.143469	0.00428266	Phantom	M	3.10344	-23.8821	PS
Random	0	0	0.00910125	Phantom	M	3.04999	-23.7023	PS
Random	0	0.412523	0	Bridget	F	3.30981	-28.7404	PS
Random	0	0.261682	0.00560748	Sam	M	3.04533	-24.6158	PS
Random	0	0.444444	0	Bridget	F	2.53169	-24.4932	PS
Random	0	0.00265604	0.00796813	Edna	F	2.67117	-26.6393	PS
Random	0	0.01	0.0528571	Phantom	M	3.30678	-23.5801	PS
Random	0	0.352571	0	Edna	F	3.1587	-23.2563	PS
Random	0	0.186408	0	Helen	F	3.31365	-25.3885	PS
Random	0	0.606544	0.0033557	Phantom	M	2.52613	-28.5905	PS
Random	0	0.26462	0.00584795	Lou	M	3.24188	-24.2173	PS
Random	0	0.406349	0.00952381	Phantom	M	2.18767	-23.6643	PS
Random	0	0.353597	0.0022309	Edna	F	3.17675	-25.861	PS
Random	0	0.0581818	0.00606061	Phantom	M	2.27639	-27.2277	PS
Random	0	0.381708	0.031746	Jack	M	2.85387	-26.1287	PS
Random	0	0.325188	0.00469925	Edna	F	2.8825	-23.6151	PS
Random	0	0.349614	0.0111397	Lou	M	2.67148	-25.63	PS
Random	0	0.0556107	0.00297915	Jack	M	3.03279	-21.3871	PS
Random	0	0.355286	0.0242634	Jody	M	3.10616	-30.4151	PS
Random	0	0	0.0108043	Lou	M	3.09161	-31.416	PS
Random	0	0.116866	0.00398406	Bridget	F	2.67242	-23.5479	PS
Random	0	0.693707	0.00379075	Edna	F	2.0716	-22.2737	PS
Random	0	0.188804	0.00109769	Lou	M	3.02401	-23.6475	PS
Random	0	0.159281	0	Bridget	F	3.09573	-23.6055	PS
Random	0	0.441406	0	Lou	M	2.79087	-27.2595	PS
Random	0	0.331606	0.00086356	Phantom	M	2.67044	-27.0732	PS
Random	0	0.2021	0.0734908	Jack	M	3.0219	-22.6865	PS
Random	0	0.164829	0.00220507	Edna	F	1.7805	-28.2418	PS
Random	0	0.419565	0.00434783	Sam	M	3.31352	-28.8171	PS
Random	0	0.146865	0.0808581	Edna	F	2.94801	-23.3704	PS
Random	0	0.292267	0.00131062	Lou	M	2.52087	-23.7409	PS
Random	0	0.197161	0.044164	Jody	M	2.97982	-22.014	PS
Random	0	0.161426	0.00419287	Lou	M	2.29987	-25.1259	PS
Random	0	0	0	Phantom	M	3.23648	-29.4373	PS
Random	0	0.245745	0.0148936	Phantom	M	3.14383	-24.0082	PS
Random	0	0.176608	0.0502924	Lou	M	3.02145	-23.2351	PS
Random	0	0.295943	0.00119332	Phantom	M	2.84025	-27.3767	PS
Random	0	0.0168998	0.0670163	Bridget	F	2.76954	-30.3742	PS
Random	0	0.271812	0.00503356	Jack	M	3.19548	-23.8225	PS
Random	0	0.534634	0.00097561	Bridget	F	3.06656	-23.5196	PS
Random	0	0.33153	0.0625966	Lou	M	2.70807	-29.2682	PS
Random	0	0.409836	0.0655738	Edna	F	2.89045	-24.023	PS
Random	0	0.00896861	0.0866966	Lou	M	2.5832	-22.9751	PS
Random	0	0.43129	0.0116279	Edna	F	2.75346	-22.5352	PS
Random	0	0.27192	0	Bridget	F	3.12265	-21.7315	PS
Random	0	0.275527	0.00162075	Phantom	M	3.27216	-23.5483	PS
Random	0	0.306258	0.00133156	Phantom	M	3.21722	-27.3813	PS
Random	0	0.419643	0	Bridget	F	2.17147	-28.3323	PS
Random	0	0.0605187	0.00720461	Sam	M	3.34383	-24.3742	PS
Random	0	0.314183	0.037702	Jody	M	2.81819	-29.8309	PS
Random	0	0.709394	0.00965759	Phantom	M	2.40546	-23.414	PS
Random	0	0.279273	0.00654545	Edna	F	3.20442	-25.5759	PS
Random	0	0.599591	0.0275792	Bridget	F	3.37897	-25.1539	PS
Random	0	0.00825472	0.0129717	Phantom	M	2.97155	-25.7352	PS
Random	0	0.343202	0.00548246	Jack	M	3.12917	-23.0375	PS
Random	0	0.45429	0.00070323	Bridget	F	3.23131	-23.9287	PS
Random	0	0.0916784	0.0338505	Phantom	M	2.95239	-24.1066	PS
Random	0	0.288177	0.0377668	Jack	M	3.41166	-26.1604	PS
Random	0	0.225126	0.0150754	Jody	M	2.9247	-23.7489	PS
Random	0	0.497418	0.00860585	Phantom	M	2.71422	-28.946	PS
Random	0	0.732739	0.00111359	Jack	M	3.30501	-26.1603	PS
Random	0	0.486999	0.0105411	Jack	M	2.93341	-23.6416	PS
Random	0	0.110919	0.0017331	Jack	M	2.43538	-29.0004	PS
Random	0	0.283961	0.00438212	Sam	M	2.86145	-23.4797	PS
Random	0	0.246667	0.0211111	Jack	M	2.7709	-24.0522	PS
Random	0	0.243792	0.0349887	Jack	M	2.75304	-27.3099	PS
Random	0	0.156208	0	Helen	F	2.49309	-24.5316	PS
Random	0	0.389713	0.0346192	Sam	M	3.28528	-22.5997	PS
Random	0	0.318792	0.00111857	Lou	M	3.22118	-21.474	PS
Random	0	0.307819	0.0765432	Bridget	F	2.80996	-24.5067	PS
Random	0	0.240252	0.00503145	Bridget	F	2.47239	-22.2535	PS
Random	0	0.558882	0.0189621	Bridget	F	2.78068	-24.5617	PS
Random	0	0.103145	0.00880503	Sam	M	2.27704	-27.4227	PS
Random	0	0.185517	0.0235964	Lou	M	3.41293	-26.7671	PS
Random	0	0.371688	0.00227101	Edna	F	3.32478	-22.4267	PS
Random	0	0.512097	0.00604839	Edna	F	2.22784	-24.1465	PS
Random	0	0.19398	0.0083612	Lou	M	2.00671	-28.9001	PS
Random	0	0.332953	0	Jody	M	2.61901	-21.2457	PS
Random	0	0.24714	0.0114416	Sam	M	2.67933	-24.1416	PS
Random	0	0.524978	0.153374	Helen	F	2.98595	-27.7312	PS
Random	0	0.282167	0.0225734	Phantom	M	2.94224	-24.8311	PS
Random	0	0.128362	0.0207824	Jody	M	3.1749	-26.789	PS
Random	0	0.555342	0.163619	Edna	F	1.57002	-27.9723	PS
Random	0	0.128981	0.0127389	Edna	F	2.53205	-24.9015	PS
Random	0	0.27227	0.00287356	Helen	F	2.82399	-21.3346	PS
Random	0	0.120055	0.0163711	Jody	M	3.23385	-24.6238	PS
Random	0	0.275488	0.0021692	Phantom	M	3.16982	-24.0875	PS
Random	0	0.315116	0.0197674	Bridget	F	2.9871	-23.3589	PS
Random	0	0.678976	0.00893389	Phantom	M	3.37366	-29.5056	WW
Random	0	0.444606	0.00364432	Bridget	F	2.59056	-27.0228	WW
Random	0	0.00230681	0.129181	Bridget	F	3.16652	-31.5114	WW
Random	0	0.767065	0.0366894	Jody	M	2.60737	-30.4155	WW
Random	0	0.353315	0.0108992	Sam	M	3.13515	-26.1586	WW
Random	0	0.591103	0.0578915	Jack	M	3.26283	-27.8341	WW
Random	0	0.557679	0.0484642	Phantom	M	3.00481	-30.4604	WW
Random	0	0.77271	0.0494109	Phantom	M	1.16982	-28.6477	WW
Random	0	0.595648	0.0462375	Jody	M	2.42306	-29.3375	WW
Random	0	0.470302	0.0331061	Phantom	M	3.22161	-26.0544	WW
Random	0	0.480962	0.0190381	Sam	M	2.88127	-29.1426	WW
Random	0	0.233392	0.027972	Edna	F	3.21902	-28.1802	WW
Random	0	0.447222	0	Sam	M	3.23317	-26.2057	WW
Random	0	0.606858	0.0661882	Bridget	F	3.17591	-26.8955	WW
Random	0	0.479199	0	Jack	M	2.63929	-28.096	WW
Random	0	1.35714	0	Jack	M	2.51407	-27.6905	WW
Random	0	0.28932	0.0941748	Sam	M	3.41378	-25.6607	WW
Random	0	0.119481	0.118182	Sam	M	3.18154	-25.6274	WW
Random	0	0.0207065	0.0560292	Jody	M	3.07516	-31.5691	WW
Random	0	0.516105	0.0134831	Jack	M	2.97373	-26.2428	WW
Random	0	0.825549	0.081044	Phantom	M	2.56064	-29.0658	WW
Random	0	0.500862	0.0396552	Phantom	M	3.10919	-28.9755	WW
Random	0	0.488307	0.01029	Phantom	M	2.44675	-30.3345	WW
Random	0	0.491429	0.0447619	Edna	F	3.38335	-29.8485	WW
Random	0	0.456817	0.00949067	Jack	M	3.22818	-28.5436	WW
Random	0	0.0436364	0.0509091	Jack	M	3.12719	-29.7336	WW
Random	0	0.406542	0.00267023	Sam	M	3.07662	-29.4702	WW
Random	0	0.533534	0.0580581	Lou	M	2.78712	-29.1326	WW
Random	0	0.581298	0.0607118	Jack	M	3.1892	-27.272	WW
Random	0	0.770724	0.00074683	Jody	M	3.3511	-28.9033	WW
Random	0	0.0992282	0.0198456	Phantom	M	3.1041	-23.4713	WW
Random	0	0.541322	0.00516529	Lou	M	3.04533	-29.3549	WW
Random	0	0.589835	0.0858984	Bridget	F	3.10463	-25.3488	WW
Random	0	0.495673	0.00236035	Helen	F	3.13783	-28.5199	WW
Random	0	0.449416	0.0126459	Sam	M	2.71353	-24.9386	WW
Random	0	0.614127	0.0745585	Lou	M	0.881385	-27.2574	WW
Random	0	0.16932	0.00434153	Bridget	F	2.64029	-24.352	WW
Random	0	0.844628	0.0322314	Helen	F	2.86426	-29.1089	WW
Random	0	0.458462	0.0504615	Edna	F	3.39484	-29.2447	WW
Random	0	0.796116	0.0819175	Helen	F	2.50296	-28.9852	WW
Random	0	0.335526	0.172149	Helen	F	2.78254	-31.1098	WW
Random	0	0.718824	0.0417647	Phantom	M	2.13651	-26.9251	WW
Random	0	0.644784	0.0566547	Edna	F	2.62893	-28.9259	WW
Random	0	0.647149	0.0254237	Phantom	M	3.33598	-26.6791	WW
Random	0	0.619574	0.0289362	Helen	F	2.7323	-26.8738	WW
Random	0	0.33619	0.00190476	Phantom	M	2.85828	-26.2465	WW
Random	0	0.494559	0.00435256	Lou	M	2.75325	-28.6069	WW
Random	0	0.609702	0.0507166	Jody	M	3.34291	-30.2314	WW
Random	0	0.589947	0.0537919	Phantom	M	3.24139	-27.253	WW
Random	0	0.315886	0.0330579	Lou	M	2.68586	-31.1008	WW
Random	0	0.217228	0.0062422	Phantom	M	2.80356	-27.9144	WW
Random	0	0.378355	0.0034632	Sam	M	3.33872	-27.572	WW
Random	0	0.402397	0.0684932	Phantom	M	2.86338	-29.8788	WW
Random	0	0.658477	0.187551	Jack	M	3.40397	-26.6366	WW
Random	0	0.513366	0.00109111	Jack	M	3.13901	-28.9234	WW
Random	0	0.638737	0.0285367	Helen	F	3.40606	-28.7812	WW
Random	0	0.511686	0.169449	Helen	F	2.2235	-27.9278	WW
Random	0	0.706349	0.0238095	Helen	F	2.62403	-27.3516	WW
Random	0	0.106024	0	Sam	M	3.09866	-23.6294	WW
Random	0	0.135894	0.242984	Jack	M	3.23394	-28.993	WW
Random	0	0.620053	0.0290237	Sam	M	2.41556	-29.8625	WW
Random	0	0.501016	0.00744753	Sam	M	2.98759	-29.2063	WW
Random	0	0.424242	0.0223979	Lou	M	2.96196	-24.6646	WW
Random	0	0.57971	0.0057971	Edna	F	3.35871	-29.3935	WW
Random	0	0.450593	0.00131752	Sam	M	3.04462	-25.8646	WW
Random	0	0.446459	0.0362694	Bridget	F	3.26673	-28.7926	WW
Random	0	0.147099	0.00539811	Jack	M	2.71448	-23.6016	WW
Random	0	0.453243	0.0438079	Jody	M	2.30884	-30.246	WW
Random	0	0.259811	0.0893099	Phantom	M	3.11772	-30.2221	WW
Random	0	0.506254	0.0394997	Helen	F	3.41069	-28.7629	WW
Random	0	0.67655	0.00628931	Lou	M	3.17318	-28.7599	WW
Random	0	0.409372	0.0397878	Sam	M	2.91803	-30.7927	WW
Random	0	0.527101	0.0322074	Jack	M	3.33809	-29.7605	WW
Random	0	0.428684	0	Edna	F	2.84655	-25.4606	WW
Random	0	0.664186	0.0530233	Jody	M	2.84061	-29.1011	WW
Random	0	0.611837	0.027671	Sam	M	2.88148	-29.6368	WW
Random	0	0.599315	0.0402397	Jack	M	3.11283	-30.097	WW
Random	0	0.576975	0.0783133	Jack	M	3.33285	-25.3298	WW
Random	0	0.368116	0.034058	Sam	M	3.28111	-25.4392	WW
Random	0	0.645812	0.0181635	Sam	M	3.3141	-28.557	WW
Random	0	0.673958	0.00478469	Phantom	M	2.80582	-30.4215	WW
Random	0	0.517463	0	Phantom	M	3.29132	-26.1903	WW
Random	0	0.565292	0.040378	Edna	F	1.5814	-29.2036	WW
Random	0	0.474843	0.00078616	Jody	M	2.55212	-24.6235	WW
Random	0	0.609589	0.00770548	Jack	M	3.21472	-29.0154	WW
Random	0	0.360984	0.00091158	Bridget	F	2.4069	-25.8386	WW
Random	0	0.513196	0.0124633	Lou	M	2.91026	-29.0695	WW
Random	0	0.413467	0.00111297	Bridget	F	2.6478	-26.5105	WW
Random	0	0.383228	0.00991885	Jody	M	2.9234	-24.585	WW
Random	0	0.349005	0.0840868	Phantom	M	3.31202	-27.6517	WW
Random	0	0.273262	0.0920666	Jack	M	2.93773	-31.1243	WW
Random	0	0.42404	0.0275459	Jack	M	3.35999	-28.4141	WW
Random	0	0.620237	0.0446781	Edna	F	3.17202	-30.2501	WW
Random	0	0.70524	0.0793304	Helen	F	2.50357	-29.0605	WW
Random	0	0.57933	0.0653631	Lou	M	2.94737	-29.0549	WW
Random	0	0.472502	0.0131681	Edna	F	3.09224	-28.378	WW
Random	0	0.46385	0.0084507	Jody	M	3.10729	-27.9557	WW
Random	0	0.656463	0.0564626	Jack	M	3.41302	-30.3064	WW
Random	0	0.513082	0.0414805	Jack	M	1.42693	-29.5493	WW
Random	0	0.548499	0.0121247	Bridget	F	3.4113	-25.7521	WW
Random	0	0.573367	0.0118745	Jack	M	3.13555	-29.0072	WW
Random	0	0.446667	0.00916667	Helen	F	3.28547	-25.6942	WW
Random	0	0.76	0.0366667	Bridget	F	3.40649	-24.492	WW
Random	0	0.462659	0.0133576	Edna	F	3.40552	-28.7157	WW
Random	0	0.510106	0.0798845	Bridget	F	3.08266	-28.9816	WW
Random	0	0.402242	0.0161893	Lou	M	3.25842	-25.9781	WW
Random	0	0.328976	0.108932	Phantom	M	3.06197	-29.9951	WW
Random	0	0.530023	0.112009	Lou	M	2.59461	-28.9923	WW
Random	0	0.496013	0.0015949	Phantom	M	3.2897	-27.3137	WW
Random	0	0.50856	0.0221551	Bridget	F	2.92484	-30.2805	WW
Random	0	0.473395	0.108257	Sam	M	3.31155	-27.3057	WW
Random	0	0.221064	0.0636079	Jody	M	2.86679	-29.9271	WW
Random	0	0.622456	0.085614	Jody	M	2.34189	-29.0937	WW
Random	0	0.65461	0.029078	Phantom	M	2.4128	-30.0804	WW
Random	0	0.353846	0.0435897	Phantom	M	2.2066	-31.7695	WW
Random	0	0.569465	0.0130246	Helen	F	3.41141	-29.7517	WW
Random	0	0.374398	0.153032	Helen	F	3.10418	-28.6249	WW
Random	0	0	0.066345	Sam	M	3.15616	-31.4904	WW
Random	0	0.373418	0.022604	Lou	M	3.37648	-29.8244	WW
Random	0	0.496017	0.0362056	Jody	M	3.15739	-27.5055	WW
Random	0	0.589723	0.0264954	Sam	M	3.13336	-28.0426	WW
Random	0	0.636775	0.0324039	Sam	M	1.41709	-27.4322	WW
Random	0	0.283593	0.0111359	Sam	M	3.39802	-27.8514	WW
Random	0	0.336783	0.0997178	Jody	M	2.8174	-27.9052	WW
Random	0	0.728261	0.0256211	Sam	M	2.50258	-22.3114	WW
Random	0	0.674394	0.052687	Bridget	F	3.3748	-29.9273	WW
Random	0	0.468959	0.00095511	Jody	M	2.3895	-28.8844	WW
Random	0	0.634518	0.0172589	Edna	F	3.37989	-25.9028	WW
Random	0	0.342708	0	Edna	F	2.48997	-23.4041	WW
Random	0	0.565498	0.0396679	Edna	F	3.0692	-30.2308	WW
Random	0	0.0980036	0.0453721	Helen	F	2.34455	-31.0256	WW
Random	0	0.535774	0.0207987	Helen	F	2.24412	-29.6587	WW
Random	0	0.190698	0.0209302	Jack	M	3.09042	-30.2861	WW
Random	0	0.449612	0.00775194	Helen	F	3.14258	-26.7197	WW
Random	0	0.47678	0.120743	Lou	M	2.68165	-30.681	WW
Random	0	0.335177	0.0110619	Sam	M	3.10241	-23.6255	WW
Random	0	0.588757	0.104536	Edna	F	3.03691	-30.5455	WW
Random	0	0.762565	0.00866551	Phantom	M	3.0751	-30.0199	WW
Random	0	0.329778	0.00622222	Edna	F	2.9628	-24.2381	WW
Random	0	0.673348	0.0386043	Lou	M	3.36308	-29.3579	WW
Random	0	0.432177	0.0168244	Edna	F	3.06316	-26.1353	WW
Random	0	0.48558	0.103002	Sam	M	2.9427	-29.2718	WW
Random	0	0.62146	0.0692996	Phantom	M	1.59895	-26.3084	WW
Random	0	0.508653	0.0278405	Helen	F	1.3161	-28.2361	WW
Random	0	0.310631	0.00249169	Lou	M	3.30961	-24.2786	WW
Random	0	0.587565	0.0484101	Helen	F	3.08049	-29.6017	WW
Random	0	0.628289	0.0830592	Sam	M	3.33943	-29.789	WW
Random	0	0.428727	0.00870511	Phantom	M	3.36035	-29.1383	WW
Random	0	0.627469	0.0611477	Bridget	F	2.91925	-29.9958	WW
Random	0	0.389212	0.0307054	Jack	M	3.40861	-27.2839	WW
Random	0	0.608573	0.0400562	Jody	M	2.12374	-29.0951	WW
Random	0	0.368617	0.0250696	Phantom	M	2.08787	-27.5814	WW
Random	0	0.774934	0.0441306	Jody	M	2.90933	-29.0488	WW
Random	0	0.322016	0.00205761	Helen	F	2.97576	-28.7894	WW
Random	0	0.160481	0.0130391	Jody	M	2.91672	-23.0854	WW
Random	0	0.536412	0.0257549	Bridget	F	2.69524	-29.7939	WW
Random	0	0.602255	0.0116641	Sam	M	1.80671	-27.3714	WW
Random	0	0.416864	0.0685579	Edna	F	3.36396	-29.1125	WW
Random	0	0.660232	0.0293436	Jack	M	2.90385	-29.6956	WW
Random	0	0.473354	0	Jody	M	2.09788	-28.7682	WW
Random	0	0.0155875	0.0131894	Lou	M	2.62533	-29.5236	WW
Random	0	0.504425	0.00589971	Jody	M	3.22756	-29.4734	WW
Random	0	0.469849	0.00879397	Phantom	M	2.91412	-29.043	WW
Random	0	0.516373	0.0436608	Jack	M	2.68676	-29.4339	WW
Random	0	0.549048	0.0219619	Bridget	F	3.05874	-28.2354	WW
Random	0	0.415362	0.138702	Sam	M	3.09028	-29.2007	WW
Random	0	0.6968	0.0128	Helen	F	2.3626	-23.7767	WW
Random	0	0.607366	0.104239	Edna	F	3.07189	-29.5146	WW
Random	0	0.371795	0.0230769	Helen	F	3.25851	-30.1016	WW
Random	0	0.658074	0.00379075	Phantom	M	3.04464	-26.8761	WW
Random	0	0.34013	0.00278035	Helen	F	2.33395	-25.2623	WW
Random	0	0.329442	0.141375	Lou	M	3.01167	-30.2912	WW
Random	0	0.515004	0.0356853	Bridget	F	1.76493	-27.0415	WW
Random	0	0.212308	0.00615385	Phantom	M	3.30415	-29.4887	WW
Random	0	0.523894	0.0955752	Helen	F	2.33647	-30.987	WW
Random	0	0.531532	0.0560561	Bridget	F	3.01395	-27.8006	WW
Random	0	0.583219	0.0378267	Bridget	F	2.91483	-24.8309	WW
Random	0	0.746684	0.0145889	Helen	F	2.68705	-27.1863	WW
Random	0	0.337513	0.0250784	Sam	M	3.18971	-29.9195	WW
Random	0	0.602554	0.00079809	Jody	M	2.87158	-25.4729	WW
Random	0	0.400178	0.0347594	Jody	M	2.67591	-26.1248	WW
Random	0	0.645492	0.00136612	Jack	M	3.39006	-29.7127	WW
Random	0	0.46076	0.0151899	Lou	M	3.40368	-26.3813	WW
Random	0	0.618033	0.0868852	Bridget	F	2.86244	-28.1665	WW
Random	0	0.584226	0.0457644	Sam	M	2.38601	-28.7023	WW
Random	0	0.596689	0.0900662	Bridget	F	3.15842	-29.6462	WW
Random	0	0.637752	0.0262676	Phantom	M	3.21813	-30.3132	WW
Random	0	0.32216	0	Helen	F	2.15776	-27.4649	WW
Random	0	0.362378	0	Phantom	M	3.35672	-26.0646	WW
Random	0	0.643662	0.028169	Phantom	M	1.63241	-26.1872	WW
Random	0	0.544938	0.00619835	Edna	F	2.9051	-27.0549	WW
Random	0	0.4689	0.0631579	Jody	M	3.2046	-30.2277	WW
Random	0	0.45207	0.0185185	Phantom	M	2.68726	-28.6775	WW
Random	0	0.724711	0.0823699	Phantom	M	3.34136	-29.1464	WW
Random	0	0.62963	0.00292398	Sam	M	3.1062	-30.2613	WW
Random	0	0.78861	0.131274	Helen	F	3.31218	-28.9798	WW
Random	0	0.0197842	0.0863309	Helen	F	3.23484	-29.7638	WW
Random	0	0.746479	0.0150905	Jody	M	2.28784	-24.9325	WW
Random	0	0.213349	0.0691299	Lou	M	3.1687	-30.4494	WW
Random	0	0.645121	0.0161591	Bridget	F	3.09215	-28.8319	WW
Random	0	0.625297	0.033848	Sam	M	2.48339	-27.037	WW
Random	0	0.605199	0.0333063	Edna	F	2.87032	-29.1197	WW
Random	0	0.792825	0.0304933	Phantom	M	2.35379	-26.4748	WW
Random	0	0.1494	0.0174482	Edna	F	2.91943	-30.4188	WW
Random	0	0.707379	0.0152672	Lou	M	2.15271	-30.7378	WW
Random	0	0.511405	0.0183959	Phantom	M	3.05665	-29.9745	WW
Random	0	0.598772	0.00204708	Sam	M	1.66926	-30.2999	WW
Random	0	0.469185	0.0524851	Jody	M	2.90798	-28.9734	WW
Random	0	0.262698	0.0539683	Edna	F	1.36368	-29.8316	WW
Random	0	0.508945	0.00089445	Jack	M	3.3094	-28.9355	WW
Random	0	0.60396	0.00720072	Helen	F	3.14127	-24.1386	WW
Random	0	0.590266	0.0548673	Jack	M	2.85091	-29.4227	WW
Random	0	0.4829	0.0150479	Lou	M	3.3981	-27.5191	WW
Random	0	0.326169	0.068268	Phantom	M	3.11104	-29.2263	WW
Random	0	0.519465	0.00486618	Bridget	F	3.08479	-29.5207	WW
Random	0	0.421687	0.100688	Jody	M	3.37923	-26.8288	WW
Random	0	0.555556	0.0779321	Edna	F	3.32201	-30.6005	WW
Random	0	0.58171	0.0944115	Jody	M	3.30299	-30.8074	WW
Random	0	0.583575	0.0381584	Helen	F	2.85228	-28.7688	WW
Random	0	0.365005	0.0677328	Phantom	M	2.93515	-30.0299	WW
Random	0	0.189586	0.0160214	Helen	F	2.83837	-30.3578	WW
Random	0	0.607325	0.00170358	Phantom	M	3.36638	-26.58	WW
Random	0	0.436441	0.0522599	Bridget	F	2.94947	-28.883	WW
Random	0	0.433333	0.087619	Edna	F	1.76413	-27.3769	WW
Random	0	0.54993	0.100563	Bridget	F	3.08628	-28.7948	WW
Random	0	0.555512	0.0213509	Helen	F	3.34183	-27.0059	WW
Random	0	0.165752	0.00987925	Phantom	M	3.26638	-27.6045	WW
Random	0	0.354978	0.0313853	Lou	M	3.07078	-29.0275	WW
Random	0	0.472281	0.00319829	Edna	F	3.23125	-27.0057	WW
Random	0	0.434259	0	Jack	M	3.35606	-25.5476	WW
Random	0	0.526494	0.110485	Lou	M	2.65451	-28.8892	WW
Random	0	0.142628	0.107372	Helen	F	3.19399	-30.2962	WW
Random	0	0.461626	0.00170551	Phantom	M	2.44061	-28.886	WW
Random	0	0.439802	0.00141643	Helen	F	3.37665	-30.1818	WW
Random	0	0.0285714	0.0650246	Phantom	M	2.52603	-30.6915	WW
Random	0	0.433621	0.00785546	Jack	M	3.39549	-27.3973	WW
Random	0	0.541604	0.00655572	Jody	M	2.79818	-25.0089	WW
Random	0	0.72451	0.0431373	Lou	M	2.07829	-28.7427	WW
Random	0	0.470803	0.0510949	Bridget	F	3.41078	-28.1936	WW
Random	0	0.596291	0.0114123	Jack	M	3.29432	-28.9608	WW
Random	0	0.589761	0.0423208	Helen	F	3.21615	-28.2526	WW
Random	0	0.545735	0.0284302	Bridget	F	3.12407	-28.4856	WW
Random	0	0.166372	0.0672566	Edna	F	2.66901	-31.2508	WW
Random	0	0.393832	0.0652432	Lou	M	1.25731	-29.5092	WW
Random	0	0.348432	0.00958188	Helen	F	3.06477	-23.0822	WW
Random	0	0.559225	0.0495334	Bridget	F	3.36069	-28.9326	WW
Random	0	0.655146	0.0758828	Lou	M	3.14261	-28.9128	WW
Random	0	0.600567	0.00849858	Helen	F	2.83131	-29.3683	WW
Random	0	0.506953	0.0733249	Phantom	M	3.07506	-29.8274	WW
Random	0	0.528787	0.0447298	Jody	M	2.80623	-27.3758	WW
Random	0	0.568182	0.0478469	Lou	M	3.01588	-29.7315	WW
Random	0	0.536111	0.138194	Phantom	M	3.32563	-27.1073	WW
Random	0	0.429189	0.278919	Phantom	M	1.31518	-27.908	WW
Random	0	0.536868	0.21541	Bridget	F	3.36507	-27.8847	WW
Random	0	0.527581	0.00353607	Phantom	M	3.40468	-27.9608	WW
Random	0	0.458668	0.0155881	Lou	M	3.27212	-29.8071	WW
Random	0	0.66385	0.0309859	Sam	M	2.49253	-24.5582	WW
Random	0	0.323944	0.00880282	Phantom	M	2.88169	-25.8128	WW
Random	0	0.816193	0.0908096	Helen	F	3.15764	-28.983	WW
Random	0	0.404538	0.00599315	Jody	M	3.40507	-28.1332	WW
Random	0	0.462673	0.164977	Helen	F	1.6994	-28.2652	WW
Random	0	0.647176	0.0358804	Sam	M	3.406	-28.8141	WW
Random	0	0.416591	0.00182315	Jack	M	3.20545	-23.6006	WW
Random	0	0.355172	0.0126437	Jack	M	3.23367	-25.592	WW
Random	0	0.411963	0.0134794	Edna	F	3.05676	-27.9969	WW
Random	0	0.350427	0.00474834	Bridget	F	2.74276	-29.2297	WW
Random	0	0.496258	0.00232258	Jack	M	3.40389	-29.8206	WW
Random	0	0.331176	0.210356	Edna	F	2.98452	-29.442	WW
Random	0	0.517101	0.00325733	Jack	M	0.915058	-29.7524	WW
Random	0	0.504119	0.00741351	Jack	M	3.41102	-27.3031	WW
Random	0	0.481448	0.11939	Jody	M	3.17365	-29.7732	WW
Random	0	0.396684	0.0892857	Lou	M	3.01653	-30.4592	WW
Random	0	0.196368	0.00567537	Sam	M	2.85597	-24.5557	WW
Random	0	0.490345	0.0468966	Bridget	F	1.82834	-27.329	WW
Random	0	0.446725	0.0023678	Edna	F	3.20219	-25.7099	WW
Random	0	0.466895	0.00114155	Bridget	F	3.18222	-28.6738	WW
Random	0	0.259494	0.00271248	Phantom	M	3.07394	-29.8821	WW
Random	0	0.745057	0.0218927	Sam	M	2.05207	-29.9838	WW
Random	0	0.424399	0.00515464	Jack	M	3.27851	-26.6279	WW
Random	0	0.508794	0.0615578	Bridget	F	2.89445	-29.9881	WW
Random	0	0.460317	0.0100251	Helen	F	3.18774	-29.7632	WW
Random	0	0.428475	0.0503694	Edna	F	2.83047	-28.8224	WW
Random	0	0.683774	0.00679245	Sam	M	3.04979	-23.6117	WW
Random	0	0.421508	0.0117429	Jack	M	1.46302	-25.7081	WW
Random	0	0.484883	0.0667427	Phantom	M	2.87783	-29.3314	WW
Random	0	0.196093	0.095417	Phantom	M	3.35632	-30.0042	WW
Random	0	0.462343	0.0104603	Jack	M	1.15594	-29.8675	WW
Random	0	0.431459	0.00087873	Helen	F	3.14873	-24.8131	WW
Random	0	0.125201	0.0513644	Bridget	F	3.02116	-23.8844	WW
Random	0	0.654944	0.0457863	Helen	F	3.37469	-26.8942	WW
Random	0	0	0.00794913	Jody	M	2.8274	-31.1035	WW
Random	0	0.730961	0.0284698	Helen	F	2.29528	-28.9556	WW
Random	0	0.407373	0.00092166	Edna	F	2.60286	-27.9082	WW
Random	0	0.506966	0.0224458	Helen	F	3.34786	-28.0591	WW
Random	0	0.480319	0.0946948	Helen	F	3.13661	-27.8211	WW
Random	0	0.339458	0.00524934	Bridget	F	2.97389	-23.7001	WW
Random	0	0.521201	0.069788	Edna	F	2.51365	-30.7148	WW
Random	0	0.495473	0.102058	Helen	F	2.61488	-29.9555	WW
Random	0	0.253648	0.00112233	Lou	M	3.37635	-29.9729	WW
Random	0	0.600663	0.0969345	Bridget	F	2.4552	-29.5304	WW
Random	0	0.426926	0.0292294	Sam	M	3.30023	-26.4584	WW
Random	0	0.613372	0.0247093	Phantom	M	3.08972	-29.9876	WW
Random	0	0.439885	0.0438931	Helen	F	2.58646	-28.9093	WW
Random	0	0.545712	0.00094251	Helen	F	2.77113	-30.1345	WW
Random	0	0.242812	0.014377	Phantom	M	3.12073	-22.8896	WW
Random	0	0	0.141935	Phantom	M	2.61997	-31.062	WW
Random	0	0.801714	0.0403917	Jack	M	3.23388	-27.3261	WW
Random	0	0.222997	0.00958188	Phantom	M	3.0551	-23.3488	WW
Random	0	0.563559	0	Jack	M	3.34272	-27.951	WW
Random	0	0.727885	0.00480769	Phantom	M	2.94868	-30.2566	WW
Random	0	0.556872	0.021327	Bridget	F	3.4088	-27.4637	WW
Random	0	0.325817	0.139797	Jack	M	3.17128	-29.5558	WW
Random	0	0.500938	0.0347092	Phantom	M	2.44987	-29.0128	WW
Random	0	0.382064	0.00859951	Bridget	F	3.39541	-28.5628	WW
Random	0	0.329218	0.00823045	Lou	M	3.28405	-29.4232	WW
Random	0	0.550698	0.0139535	Lou	M	2.75395	-27.2711	WW
Random	0	0.537195	0.0432927	Edna	F	2.86646	-30.5897	WW
Random	0	0.544271	0.00325521	Bridget	F	1.49817	-27.3604	WW
Random	0	0.550098	0.0147348	Phantom	M	3.06004	-24.6091	WW
Random	0	0	0	Phantom	M	2.74079	-31.2093	WW
Random	0	0.621228	0.0317888	Bridget	F	3.26213	-28.3127	WW
Random	0	0.556265	0.0486832	Bridget	F	2.90932	-28.4036	WW
Random	0	0.42161	0.0413136	Jody	M	3.09162	-28.6639	WW
Random	0	0.449167	0.005	Lou	M	3.01098	-29.5252	WW
Random	0	0.584446	0.156324	Phantom	M	1.70061	-28.9223	WW
Random	0	0.641735	0.0463725	Edna	F	3.3684	-28.7199	WW
Random	0	0.620262	0.00482426	Lou	M	3.1844	-27.9361	WW
Random	0	0.287549	0.00098814	Sam	M	3.19661	-24.1203	WW
Random	0	0.329096	0.00070622	Bridget	F	2.99865	-25.0913	WW
Random	0	0.729473	0.0267934	Sam	M	2.70128	-28.5446	WW
Random	0	0.464088	0.0128913	Edna	F	3.08442	-29.9864	WW
Random	0	0.450135	0.0952381	Bridget	F	3.02329	-30.2191	WW
Random	0	0.105318	0.0448384	Edna	F	3.05294	-23.4227	WW
Random	0	0.76	0.0923077	Jody	M	2.96712	-29.3983	WW
Random	0	0.519481	0.0138528	Edna	F	3.29277	-25.0467	WW
Random	0	0.537634	0.0175953	Sam	M	2.59336	-29.0345	WW
Random	0	0.34985	0.0112613	Edna	F	2.52252	-25.4195	WW
RandWithin	0	0.717831	0.0128676	Sam	M	1.86834	-24.651	.
RandWithin	0	0	0	Jack	M	2.57031	-32.5649	.
RandWithin	0	0	0	Jack	M	3.40913	-32.5822	.
RandWithin	0	0	0.02213	Jack	M	2.28542	-32.3445	.
RandWithin	0	0	0	Jack	M	1.15589	-32.6385	.
RandWithin	0	0	0	Jack	M	3.19289	-32.5117	.
RandWithin	0	0	0.0258532	Jody	M	3.02911	-30.93	.
RandWithin	0	0	0.00661626	Jody	M	2.78817	-30.7976	.
RandWithin	0	0	0.00105932	Jody	M	2.78632	-30.7313	.
RandWithin	0	0	0	Jody	M	3.1105	-30.7982	.
RandWithin	0	0	0.0192308	Jody	M	2.89169	-30.7984	.
RandWithin	0	0.238422	0	Lou	M	2.28225	-23.3826	FOR
RandWithin	0	0.397359	0.00720288	Edna	F	3.08546	-23.9241	FOR
RandWithin	0	0.415058	0.00579151	Edna	F	2.4592	-24.227	FOR
RandWithin	0	0.0993631	0.0738854	Helen	F	2.77578	-21.1561	FOR
RandWithin	0	0.342391	0.0013587	Helen	F	3.23054	-23.9658	FOR
RandWithin	0	0.27909	0	Helen	F	3.02818	-21.1808	FOR
RandWithin	0	0.268156	0	Helen	F	2.48957	-21.1507	FOR
RandWithin	0	0.331162	0.00108578	Helen	F	3.23658	-21.6983	FOR
RandWithin	0	0.363949	0.00171674	Helen	F	3.26052	-21.4801	FOR
RandWithin	0	0.279805	0.00121655	Helen	F	3.11074	-24.5852	FOR
RandWithin	0	0.40326	0.00070872	Sam	M	3.38253	-29.1118	FOR
RandWithin	0	0.349239	0.00345781	Sam	M	3.22463	-28.7805	FOR
RandWithin	0	0.433898	0.059322	Sam	M	2.68338	-30.2623	FOR
RandWithin	0	0.452888	0.00202634	Lou	M	3.31976	-24.9363	FOR
RandWithin	0	0.135294	0	Lou	M	2.70572	-22.2566	FOR
RandWithin	0	0.598207	0.00407498	Lou	M	3.38311	-25.605	FOR
RandWithin	0	0.177931	0.00413793	Lou	M	3.25084	-22.0812	FOR
RandWithin	0	0.528	0.026	Lou	M	3.41372	-25.3744	FOR
RandWithin	0	0.477903	0.00719424	Lou	M	3.19247	-26.0477	FOR
RandWithin	0	0.459979	0.0565635	Lou	M	3.40725	-30.3751	FOR
RandWithin	0	0.558801	0.0076864	Lou	M	3.3476	-24.4252	FOR
RandWithin	0	0.564578	0.0185422	Lou	M	3.18686	-23.9348	FOR
RandWithin	0	0.205882	0.137605	Lou	M	1.9601	-25.7548	FOR
RandWithin	0	0.863186	0.0216022	Lou	M	3.15672	-21.0719	FOR
RandWithin	0	0.702371	0.0449714	Lou	M	3.41148	-28.3042	FOR
RandWithin	0	0.5843	0.0115968	Lou	M	3.01338	-29.44	FOR
RandWithin	0	0	0.00208768	Lou	M	2.96899	-31.0318	FOR
RandWithin	0	0.59633	0.133028	Lou	M	2.96136	-24.9096	FOR
RandWithin	0	0.252414	0.0551724	Phantom	M	2.56129	-30.4751	FOR
RandWithin	0	0.474766	0.0485981	Phantom	M	3.09827	-28.9513	FOR
RandWithin	0	0.617625	0.00448096	Phantom	M	3.05587	-29.7688	FOR
RandWithin	0	0.433979	0.00088028	Phantom	M	2.96702	-29.2967	FOR
RandWithin	0	0.496192	0.0163221	Phantom	M	2.84558	-29.1755	FOR
RandWithin	0	0.595701	0.0163767	Phantom	M	3.12848	-28.8778	FOR
RandWithin	0	0.517155	0.0100418	Phantom	M	3.12908	-29.4311	FOR
RandWithin	0	0.65669	0.00880282	Phantom	M	3.40632	-28.783	FOR
RandWithin	0	0.611492	0.00428816	Phantom	M	2.80734	-29.1292	FOR
RandWithin	0	0.453091	0.00509091	Phantom	M	3.10685	-29.2841	FOR
RandWithin	0	0.544304	0.0168776	Phantom	M	2.88952	-29.2461	FOR
RandWithin	0	0.584333	0.00159872	Phantom	M	3.11073	-29.7635	FOR
RandWithin	0	0.768143	0.00188501	Phantom	M	3.17119	-29.1768	FOR
RandWithin	0	0.53955	0.0784566	Phantom	M	2.26218	-29.8159	FOR
RandWithin	0	0.362264	0.0122642	Phantom	M	1.59232	-30.0391	FOR
RandWithin	0	0.197802	0.00941915	Phantom	M	2.67725	-29.6736	FOR
RandWithin	0	0.301606	0.00038226	Phantom	M	3.13769	-29.8196	FOR
RandWithin	0	0.66462	0.00613968	Phantom	M	2.43764	-28.9132	FOR
RandWithin	0	0.549107	0.03125	Phantom	M	3.29626	-29.1091	FOR
RandWithin	0	0.597628	0.00273723	Phantom	M	3.38472	-29.9742	FOR
RandWithin	0	0.628237	0.031746	Phantom	M	2.82472	-29.2209	FOR
RandWithin	0	0.349066	0.0609636	Phantom	M	3.01658	-30.5325	FOR
RandWithin	0	0.361835	0.0427529	Phantom	M	3.1221	-29.7571	FOR
RandWithin	0	0.528102	0.0180276	Phantom	M	3.39538	-29.5342	FOR
RandWithin	0	0.467381	0.00486855	Phantom	M	2.2758	-29.6887	FOR
RandWithin	0	0.726724	0.012069	Phantom	M	3.02632	-28.9944	FOR
RandWithin	0	0.668605	0	Phantom	M	3.21838	-29.0236	FOR
RandWithin	0	0.592745	0.0222589	Phantom	M	2.69422	-28.9994	FOR
RandWithin	0	0.772444	0.00088889	Phantom	M	3.15381	-29.2785	FOR
RandWithin	0	0.67887	0.14749	Phantom	M	2.85696	-30.4291	FOR
RandWithin	0	0.554321	0	Bridget	F	2.58934	-30.32	FOR
RandWithin	0	0.287854	0	Bridget	F	1.42446	-29.961	FOR
RandWithin	0	0	0.130081	Bridget	F	3.36214	-31.3494	FOR
RandWithin	0	0.320552	0.00153374	Bridget	F	3.41336	-28.8653	FOR
RandWithin	0	0.422182	0.00089445	Bridget	F	2.79812	-30.4571	FOR
RandWithin	0	0.407051	0	Bridget	F	3.09601	-30.1812	FOR
RandWithin	0	0.330049	0.0180624	Bridget	F	3.38778	-29.5877	FOR
RandWithin	0	0.165613	0.0404551	Bridget	F	3.34708	-31.3336	FOR
RandWithin	0	0.254438	0.00591716	Bridget	F	2.11452	-29.7683	FOR
RandWithin	0	0.474312	0.0100917	Bridget	F	0.729908	-29.721	FOR
RandWithin	0	0.551208	0.00575374	Edna	F	3.1059	-24.7455	FOR
RandWithin	0	0.230856	0.00563063	Edna	F	3.39296	-24.2464	FOR
RandWithin	0	0.351184	0.0514933	Edna	F	2.73121	-25.2086	FOR
RandWithin	0	0.567731	0.0474547	Edna	F	2.99956	-25.3381	FOR
RandWithin	0	0.493776	0.033195	Helen	F	2.71384	-22.8997	FOR
RandWithin	0	0.371865	0.00763359	Helen	F	1.86801	-23.0509	FOR
RandWithin	0	0.344828	0.00255428	Helen	F	3.18008	-22.891	FOR
RandWithin	0	0.399731	0.0107672	Sam	M	3.08856	-29.1634	FOR
RandWithin	0	0.394191	0.00968188	Sam	M	3.24649	-30.5802	FOR
RandWithin	0	0.244586	0.00382166	Sam	M	3.05248	-29.9132	FOR
RandWithin	0	0.373134	0	Sam	M	3.31384	-28.937	FOR
RandWithin	0	0.403915	0.0338078	Sam	M	3.27458	-29.69	FOR
RandWithin	0	0.208678	0.00826446	Sam	M	2.96402	-29.7329	FOR
RandWithin	0	0.508314	0	Sam	M	3.09943	-30.0767	FOR
RandWithin	0	0.460824	0.00116077	Sam	M	3.02598	-29.1583	FOR
RandWithin	0	0.146667	0.00533333	Sam	M	3.02599	-25.7872	FOR
RandWithin	0	0.379703	0.00787402	Sam	M	2.57087	-24.4199	FOR
RandWithin	0	0.501789	0.009839	Sam	M	2.96147	-23.4136	FOR
RandWithin	0	0.654321	0.00224467	Sam	M	3.11313	-22.9892	FOR
RandWithin	0	0.58227	0.0127551	Sam	M	2.37279	-24.0364	FOR
RandWithin	0	0.313199	0.0201342	Sam	M	2.96938	-23.2444	FOR
RandWithin	0	0.0219224	0.244519	Jack	M	3.14735	-29.9622	FOR
RandWithin	0	0.376147	0.141547	Jack	M	3.40896	-30.3049	FOR
RandWithin	0	0.567694	0.0933707	Jack	M	3.00934	-30.4878	FOR
RandWithin	0	0	0.0165975	Jack	M	2.98028	-30.6083	FOR
RandWithin	0	0.419087	0	Jody	M	1.87549	-27.4992	FOR
RandWithin	0	0.365854	0.00286944	Jody	M	1.826	-28.3913	FOR
RandWithin	0	0.422819	0.00402685	Jody	M	1.7595	-29.0662	FOR
RandWithin	0	0.249012	0	Jody	M	2.73475	-27.3993	FOR
RandWithin	0	0.379061	0.00577617	Jody	M	2.73289	-29.6381	FOR
RandWithin	0	0.392598	0.00362845	Jody	M	3.2745	-28.5035	FOR
RandWithin	0	0.298107	0.0410095	Jody	M	2.10002	-30.436	FOR
RandWithin	0	0.185958	0.0056926	Jody	M	3.24591	-27.4608	FOR
RandWithin	0	0.420263	0.00093809	Jody	M	3.28966	-29.0241	FOR
RandWithin	0	0.336758	0.0353881	Jody	M	2.22558	-30.906	FOR
RandWithin	0	0.424328	0	Jody	M	2.38155	-27.1167	FOR
RandWithin	0	0.407966	0	Jody	M	3.28194	-27.5584	FOR
RandWithin	0	0.2	0.0129496	Jody	M	2.15047	-28.4461	FOR
RandWithin	0	0.259398	0.0037594	Jody	M	3.29842	-28.7102	FOR
RandWithin	0	0.453162	0	Jody	M	3.18584	-27.3282	FOR
RandWithin	0	0.352484	0	Jody	M	3.24838	-28.5932	FOR
RandWithin	0	0.525627	0.00374111	Lou	M	3.4131	-25.0493	FOR
RandWithin	0	0.638837	0.0196998	Lou	M	2.93781	-25.2838	FOR
RandWithin	0	0.664422	0.013468	Lou	M	3.41351	-24.1178	FOR
RandWithin	0	0.408	0.016	Lou	M	3.18116	-25.2983	FOR
RandWithin	0	0.409847	0.0179641	Lou	M	3.3104	-25.0808	FOR
RandWithin	0	0.337995	0	Lou	M	2.44552	-21.2217	FOR
RandWithin	0	0.662963	0.0185185	Lou	M	2.72695	-24.4608	FOR
RandWithin	0	0.508127	0.00513259	Phantom	M	2.6793	-28.8316	FOR
RandWithin	0	0.259923	0.0448143	Phantom	M	2.3934	-30.445	FOR
RandWithin	0	0.517857	0.0289116	Phantom	M	3.17065	-29.6214	FOR
RandWithin	0	0.268685	0.0037843	Edna	F	2.61203	-23.1322	FOR
RandWithin	0	0.362813	0.00208914	Edna	F	2.7945	-23.2134	FOR
RandWithin	0	0.492569	0.116773	Edna	F	2.24287	-27.0217	FOR
RandWithin	0	0.224168	0.0639229	Edna	F	3.06392	-23.084	FOR
RandWithin	0	0.210674	0.279026	Edna	F	2.86103	-24.6223	FOR
RandWithin	0	0.514601	0.0781373	Edna	F	3.3504	-25.1578	FOR
RandWithin	0	0.445591	0.011257	Edna	F	3.12803	-25.5054	FOR
RandWithin	0	0.213483	0.00124844	Edna	F	3.17013	-23.7234	FOR
RandWithin	0	0.375	0.00114679	Helen	F	3.41199	-21.3738	FOR
RandWithin	0	0.336438	0.00582072	Helen	F	2.66098	-21.3404	FOR
RandWithin	0	0.225585	0	Helen	F	2.92384	-22.0451	FOR
RandWithin	0	0.345372	0.00112867	Helen	F	2.82386	-21.4861	FOR
RandWithin	0	0.407972	0	Helen	F	2.92523	-21.3606	FOR
RandWithin	0	0.571076	0.00986031	Sam	M	3.14752	-23.9033	FOR
RandWithin	0	0.582973	0.0036075	Sam	M	2.51668	-23.0537	FOR
RandWithin	0	0.375768	0.00175593	Jody	M	2.55595	-28.3364	FOR
RandWithin	0	0.309819	0.00381316	Jody	M	3.09769	-28.0752	FOR
RandWithin	0	0.0695187	0.0160428	Lou	M	3.14043	-22.1291	FP
RandWithin	0	0.278986	0.00120773	Bridget	F	3.26243	-29.3747	FP
RandWithin	0	0.0224138	0.00172414	Bridget	F	3.21395	-29.4466	FP
RandWithin	0	0.265212	0	Edna	F	3.40817	-23.7434	FP
RandWithin	0	0	0	Helen	F	2.83895	-21.7838	FP
RandWithin	0	0	0.0037594	Helen	F	2.55418	-21.3909	FP
RandWithin	0	0.244228	0	Sam	M	3.19764	-29.2078	FP
RandWithin	0	0.378074	0.00307377	Sam	M	3.10531	-29.4484	FP
RandWithin	0	0.168925	0.00903342	Sam	M	2.64181	-29.4714	FP
RandWithin	0	0.268696	0.0113043	Sam	M	2.87093	-23.6179	FP
RandWithin	0	0.0116732	0.0466926	Sam	M	2.63428	-24.6303	FP
RandWithin	0	0.39234	0.00207039	Sam	M	2.633	-24.2778	FP
RandWithin	0	0	0.00115607	Sam	M	3.39736	-23.9014	FP
RandWithin	0	0.121246	0.00444939	Sam	M	2.14764	-23.647	FP
RandWithin	0	0.00126263	0.00631313	Sam	M	2.74948	-23.9805	FP
RandWithin	0	0.121979	0.0149597	Sam	M	2.99556	-23.9643	FP
RandWithin	0	0.014975	0.00166389	Sam	M	3.00964	-23.8902	FP
RandWithin	0	0.0289474	0.0697368	Sam	M	3.00243	-23.3675	FP
RandWithin	0	0	0.00133869	Sam	M	3.21209	-25.4754	FP
RandWithin	0	0	0.011889	Sam	M	2.88037	-24.6248	FP
RandWithin	0	0.211793	0.0397112	Sam	M	2.98851	-25.0272	FP
RandWithin	0	0.259414	0.00627615	Sam	M	2.90481	-23.9879	FP
RandWithin	0	0.294416	0.00169205	Jody	M	3.03273	-29.0025	FP
RandWithin	0	0.34947	0	Jody	M	2.89947	-27.69	FP
RandWithin	0	0.217014	0	Jody	M	3.17356	-27.8896	FP
RandWithin	0	0.270227	0	Jody	M	2.14884	-27.7431	FP
RandWithin	0	0.221818	0	Jody	M	3.26228	-28.0401	FP
RandWithin	0	0	0	Lou	M	1.36435	-25.0335	FP
RandWithin	0	0.0160099	0.00615764	Lou	M	1.61968	-24.7325	FP
RandWithin	0	0.188725	0	Lou	M	1.75845	-23.9358	FP
RandWithin	0	0	0	Lou	M	2.91626	-31.3527	HW
RandWithin	0	0	0.00131752	Lou	M	3.26041	-30.7486	HW
RandWithin	0	0	0	Lou	M	2.95675	-31.1036	HW
RandWithin	0	0	0	Phantom	M	2.9106	-30.9386	HW
RandWithin	0	0.303694	0.102599	Phantom	M	2.97415	-30.2917	HW
RandWithin	0	0	0	Phantom	M	2.95985	-30.6937	HW
RandWithin	0	0	0	Phantom	M	2.85872	-30.8626	HW
RandWithin	0	0.0455927	0.00911854	Phantom	M	2.86594	-32.1851	HW
RandWithin	0	0	0	Phantom	M	3.21169	-30.841	HW
RandWithin	0	0	0	Phantom	M	3.04169	-30.8887	HW
RandWithin	0	0	0.0288809	Phantom	M	3.10004	-30.5482	HW
RandWithin	0	0	0.00195313	Phantom	M	2.69245	-30.6362	HW
RandWithin	0	0	0	Phantom	M	2.56916	-30.6119	HW
RandWithin	0	0	0.0131435	Phantom	M	2.98575	-30.6425	HW
RandWithin	0	0.366947	0.0868347	Phantom	M	3.10388	-30.3245	HW
RandWithin	0	0.019174	0.00884956	Phantom	M	3.05907	-30.5224	HW
RandWithin	0	0.28269	0.0597758	Phantom	M	3.00907	-30.3641	HW
RandWithin	0	0	0	Phantom	M	2.69515	-30.7195	HW
RandWithin	0	0.0050505	0.00252525	Phantom	M	2.70657	-30.6082	HW
RandWithin	0	0	0	Phantom	M	3.27213	-30.6602	HW
RandWithin	0	0.350785	0.0222513	Phantom	M	3.02136	-30.2736	HW
RandWithin	0	0.00723589	0.00434153	Phantom	M	3.0295	-30.6115	HW
RandWithin	0	0.00430571	0.00322928	Phantom	M	3.24861	-30.4108	HW
RandWithin	0	0.0829493	0.184332	Phantom	M	2.98929	-30.2841	HW
RandWithin	0	0.307076	0.182911	Phantom	M	3.05212	-30.3586	HW
RandWithin	0	0	0.00146628	Phantom	M	2.87241	-30.7404	HW
RandWithin	0	0.00129199	0.00516796	Phantom	M	2.94171	-30.6512	HW
RandWithin	0	0	0.00180832	Phantom	M	3.18792	-30.9422	HW
RandWithin	0	0	0.00361664	Phantom	M	2.83075	-30.8992	HW
RandWithin	0	0	0	Phantom	M	2.91181	-30.5314	HW
RandWithin	0	0	0.0236318	Bridget	F	3.03444	-31.418	HW
RandWithin	0	0.139183	0.0408472	Bridget	F	3.39908	-30.9737	HW
RandWithin	0	0	0.0456432	Bridget	F	3.08116	-31.2898	HW
RandWithin	0	0	0.00119904	Bridget	F	2.90018	-31.4661	HW
RandWithin	0	0	0.046042	Bridget	F	3.11075	-31.163	HW
RandWithin	0	0.114931	0.00687623	Bridget	F	3.40055	-31.0881	HW
RandWithin	0	0	0.0294511	Bridget	F	3.22149	-31.5344	HW
RandWithin	0	0	0.00529101	Bridget	F	3.11822	-31.2208	HW
RandWithin	0	0.0925	0.03875	Bridget	F	2.8081	-31.1201	HW
RandWithin	0	0	0.0142405	Bridget	F	3.03435	-30.1327	HW
RandWithin	0	0	0	Bridget	F	3.01939	-31.709	HW
RandWithin	0	0	0.0802676	Bridget	F	3.26229	-31.1621	HW
RandWithin	0	0.107351	0.0606768	Bridget	F	2.84183	-31.0317	HW
RandWithin	0	0	0	Sam	M	3.07597	-32.0297	HW
RandWithin	0	0	0.180225	Sam	M	2.93128	-31.2017	HW
RandWithin	0	0.0193424	0.116054	Sam	M	3.12981	-30.9967	HW
RandWithin	0	0	0.00190114	Sam	M	2.70393	-31.3931	HW
RandWithin	0	0.357553	0.0669216	Sam	M	3.05077	-30.2841	HW
RandWithin	0	0	0	Sam	M	3.3809	-31.4596	HW
RandWithin	0	0.0504854	0.0699029	Sam	M	2.53523	-31.0615	HW
RandWithin	0	0	0.0110092	Sam	M	2.90464	-31.7571	HW
RandWithin	0	0	0	Sam	M	3.15826	-31.832	HW
RandWithin	0	0.146688	0.0788644	Sam	M	3.02018	-31.145	HW
RandWithin	0	0.278526	0.0206649	Sam	M	1.57447	-30.5848	HW
RandWithin	0	0	0.0193165	Sam	M	3.26594	-31.5667	HW
RandWithin	0	0	0.0720288	Sam	M	3.15055	-31.2085	HW
RandWithin	0	0.19	0.064	Sam	M	3.3733	-30.8299	HW
RandWithin	0	0	0.00101523	Jack	M	2.26626	-30.7189	HW
RandWithin	0	0.624309	0.00460405	Jack	M	2.84513	-29.7974	HW
RandWithin	0	0	0	Jack	M	1.1153	-32.4299	HW
RandWithin	0	0.28028	0.0810811	Jack	M	3.2773	-30.3788	HW
RandWithin	0	0.00562588	0.00562588	Jack	M	3.12057	-30.7002	HW
RandWithin	0	0.314972	0.138418	Jack	M	3.18987	-30.3324	HW
RandWithin	0	0	0	Jack	M	3.05363	-30.5453	HW
RandWithin	0	0	0	Jack	M	3.00939	-30.6227	HW
RandWithin	0	0.0611111	0.00972222	Jack	M	2.97099	-30.4315	HW
RandWithin	0	0.008	0.00342857	Jack	M	3.30615	-30.4817	HW
RandWithin	0	0	0.00385604	Jack	M	2.66122	-30.6961	HW
RandWithin	0	0.0279232	0.0418848	Jack	M	3.39534	-30.6453	HW
RandWithin	0	0.00179533	0.00897666	Jack	M	2.66062	-30.5156	HW
RandWithin	0	0.052835	0	Jack	M	3.00333	-30.4152	HW
RandWithin	0	0.131479	0.0202276	Jack	M	3.35519	-30.4548	HW
RandWithin	0	0.251434	0.00095602	Jody	M	1.57016	-27.967	HW
RandWithin	0	0.446556	0.00475059	Jody	M	1.20923	-29.3799	HW
RandWithin	0	0.106904	0.00111359	Jody	M	2.09736	-28.0035	HW
RandWithin	0	0	0	Jody	M	3.1614	-31.3533	HW
RandWithin	0	0.191972	0.0383944	Jody	M	2.74957	-30.7278	HW
RandWithin	0	0	0.0021978	Jody	M	2.88515	-31.2925	HW
RandWithin	0	0	0	Jody	M	2.81467	-31.0877	HW
RandWithin	0	0.248052	0.0220779	Jody	M	3.41383	-30.6118	HW
RandWithin	0	0.00191205	0	Jody	M	3.05301	-31.0943	HW
RandWithin	0	0	0	Jody	M	2.9302	-31.3024	HW
RandWithin	0	0.173832	0.100935	Jody	M	2.82176	-30.7202	HW
RandWithin	0	0.0784708	0.144869	Phantom	M	3.40176	-30.4785	OW
RandWithin	0	0.0689655	0.0517241	Phantom	M	3.0916	-30.338	OW
RandWithin	0	0.0582751	0.170163	Sam	M	3.1104	-31.7041	OW
RandWithin	0	0	0	Sam	M	3.34085	-32.1527	OW
RandWithin	0	0.371319	0.00640205	Sam	M	3.39169	-30.8611	OW
RandWithin	0	0	0	Sam	M	2.83618	-32.0375	OW
RandWithin	0	0	0	Sam	M	3.07325	-31.972	OW
RandWithin	0	0	0	Sam	M	2.6986	-32.0942	OW
RandWithin	0	0	0	Sam	M	3.02935	-32.0936	OW
RandWithin	0	0.475728	0.0264784	Jack	M	1.52452	-30.2362	OW
RandWithin	0	0.0626598	0.13555	Lou	M	3.38693	-22.621	PS
RandWithin	0	0.306818	0.00454545	Lou	M	3.38907	-22.5333	PS
RandWithin	0	0.151625	0.032491	Lou	M	2.77441	-21.7533	PS
RandWithin	0	0.36153	0.00115875	Lou	M	3.41361	-23.4921	PS
RandWithin	0	0.20447	0.0339404	Lou	M	3.40646	-24.5983	PS
RandWithin	0	0.28739	0.00659824	Lou	M	3.33475	-21.0792	PS
RandWithin	0	0	0.00171086	Lou	M	2.54767	-23.2467	PS
RandWithin	0	0.274914	0	Lou	M	3.00597	-22.0503	PS
RandWithin	0	0.0442225	0.0171184	Lou	M	3.09169	-21.1659	PS
RandWithin	0	0.11041	0.00630915	Bridget	F	3.15297	-29.9856	PS
RandWithin	0	0.211048	0.0141643	Edna	F	2.94153	-23.4658	PS
RandWithin	0	0.122059	0.00294118	Edna	F	3.38774	-23.6611	PS
RandWithin	0	0.55092	0.00490798	Edna	F	2.98773	-23.4414	PS
RandWithin	0	0.113318	0.00116822	Helen	F	3.04214	-20.9789	PS
RandWithin	0	0.712702	0.0230179	Helen	F	3.32283	-23.7124	PS
RandWithin	0	0.266733	0	Helen	F	2.92769	-21.062	PS
RandWithin	0	0.293542	0.00097847	Helen	F	3.38034	-21.1768	PS
RandWithin	0	0.550841	0.00080064	Sam	M	2.97227	-23.4628	PS
RandWithin	0	0.285421	0.00410678	Sam	M	3.27608	-23.0006	PS
RandWithin	0	0.0985915	0.0537772	Sam	M	2.93588	-25.1188	PS
RandWithin	0	0.626947	0.00155763	Sam	M	3.41053	-23.8746	PS
RandWithin	0	0.020202	0.0214646	Sam	M	2.02962	-24.9812	PS
RandWithin	0	0.381769	0.00270758	Sam	M	3.0212	-23.6299	PS
RandWithin	0	0.286385	0.00234742	Lou	M	3.23889	-22.6744	PS
RandWithin	0	0.271159	0.00328677	Lou	M	3.04205	-22.0858	PS
RandWithin	0	0.398382	0.00202224	Lou	M	3.39552	-22.9472	PS
RandWithin	0	0.417486	0.0010929	Lou	M	3.13885	-22.6892	PS
RandWithin	0	0.371833	0.00223547	Lou	M	3.37163	-22.9047	PS
RandWithin	0	0.00228571	0.0125714	Lou	M	3.37928	-22.6183	PS
RandWithin	0	0.0520446	0.00619579	Lou	M	3.38942	-22.0169	PS
RandWithin	0	0.0897959	0.0122449	Lou	M	3.41301	-20.9145	PS
RandWithin	0	0.258112	0.00147493	Lou	M	3.41224	-24.888	PS
RandWithin	0	0.289958	0.00424328	Lou	M	3.3594	-22.6159	PS
RandWithin	0	0.0680787	0.026475	Lou	M	2.73445	-21.2311	PS
RandWithin	0	0.29249	0.00263505	Lou	M	2.90925	-22.5992	PS
RandWithin	0	0.00438596	0.0146199	Lou	M	3.23905	-21.6825	PS
RandWithin	0	0.180667	0.00115075	Lou	M	2.90627	-22.5381	PS
RandWithin	0	0.00458015	0.00610687	Lou	M	2.94282	-22.2185	PS
RandWithin	0	0.330044	0.00109649	Lou	M	2.4443	-22.239	PS
RandWithin	0	0	0.00295858	Lou	M	2.77248	-24.8563	PS
RandWithin	0	0.191351	0.158919	Lou	M	3.01672	-26.1322	PS
RandWithin	0	0.144712	0.142857	Lou	M	2.87985	-23.122	PS
RandWithin	0	0.352625	0.0013459	Lou	M	3.20699	-22.9684	PS
RandWithin	0	0.171014	0	Lou	M	2.76211	-23.0772	PS
RandWithin	0	0.339429	0.00685714	Lou	M	3.10224	-23.3547	PS
RandWithin	0	0	0.0104478	Lou	M	2.15598	-20.7923	PS
RandWithin	0	0.0733427	0.0521862	Lou	M	2.07522	-30.6554	PS
RandWithin	0	0.0953757	0.0115607	Lou	M	2.65773	-25.0502	PS
RandWithin	0	0.0842391	0.0597826	Lou	M	2.9509	-20.9747	PS
RandWithin	0	0.356629	0.00102775	Lou	M	3.34939	-21.4455	PS
RandWithin	0	0.398467	0.0063857	Lou	M	3.09718	-23.1639	PS
RandWithin	0	0.222958	0.0264901	Lou	M	2.44128	-23.2043	PS
RandWithin	0	0.221643	0.122555	Lou	M	2.85488	-21.4286	PS
RandWithin	0	0.49331	0.0044603	Lou	M	2.21633	-23.0502	PS
RandWithin	0	0.523035	0.00361337	Lou	M	3.06686	-23.0685	PS
RandWithin	0	0.431235	0.00815851	Lou	M	2.39916	-26.1824	PS
RandWithin	0	0.286853	0.0169323	Lou	M	3.37192	-23.6182	PS
RandWithin	0	0	0.0105541	Lou	M	3.41408	-22.3994	PS
RandWithin	0	0.120438	0.20438	Lou	M	2.48389	-25.1552	PS
RandWithin	0	0.316336	0	Lou	M	2.90835	-23.1032	PS
RandWithin	0	0.0194411	0.00972053	Lou	M	2.79762	-23.7102	PS
RandWithin	0	0	0.00356295	Lou	M	2.99887	-21.7514	PS
RandWithin	0	0.379167	0.0111111	Lou	M	2.86536	-23.1478	PS
RandWithin	0	0	0.0104012	Lou	M	3.41256	-22.7213	PS
RandWithin	0	0.149306	0.0399306	Lou	M	2.74046	-23.5983	PS
RandWithin	0	0.0881988	0.0322981	Lou	M	3.34271	-22.7859	PS
RandWithin	0	0.36383	0.00425532	Lou	M	3.1918	-21.985	PS
RandWithin	0	0.34944	0.0147059	Lou	M	2.72297	-22.6063	PS
RandWithin	0	0.342246	0.0040107	Lou	M	2.93141	-22.5099	PS
RandWithin	0	0.209581	0.0449102	Lou	M	3.11644	-22.4681	PS
RandWithin	0	0.313793	0.00344828	Lou	M	3.00394	-22.9142	PS
RandWithin	0	0.260606	0.0825758	Phantom	M	3.15704	-29.8851	PS
RandWithin	0	0.401589	0.0308914	Phantom	M	3.12693	-30.1839	PS
RandWithin	0	0.0551053	0.012966	Phantom	M	2.84401	-29.7826	PS
RandWithin	0	0.487013	0.0121753	Phantom	M	3.08309	-29.5455	PS
RandWithin	0	0.202882	0.0388027	Phantom	M	3.00799	-29.7474	PS
RandWithin	0	0.514477	0.00111359	Phantom	M	3.3679	-29.6724	PS
RandWithin	0	0.0590778	0.0360231	Phantom	M	2.98768	-29.8098	PS
RandWithin	0	0.404348	0.0101449	Bridget	F	1.86393	-30.154	PS
RandWithin	0	0.00931677	0.00776398	Bridget	F	3.376	-29.0299	PS
RandWithin	0	0.109977	0	Bridget	F	3.12767	-28.9531	PS
RandWithin	0	0.472222	0.00771605	Bridget	F	2.91842	-29.0455	PS
RandWithin	0	0.393728	0.010453	Bridget	F	2.86144	-29.0168	PS
RandWithin	0	0.199074	0.0262346	Bridget	F	3.102	-29.9654	PS
RandWithin	0	0.330285	0.00304878	Bridget	F	2.59574	-29.704	PS
RandWithin	0	0.438705	0.00308404	Bridget	F	2.5912	-29.0213	PS
RandWithin	0	0	0.00125786	Bridget	F	3.07238	-28.9969	PS
RandWithin	0	0.230769	0.00854701	Bridget	F	3.04868	-29.0707	PS
RandWithin	0	0.254545	0.00227273	Bridget	F	1.97685	-29.2883	PS
RandWithin	0	0.414663	0.00600962	Bridget	F	3.38757	-28.6709	PS
RandWithin	0	0.260116	0.0192678	Bridget	F	2.16803	-28.8242	PS
RandWithin	0	0.279675	0.00162602	Bridget	F	3.40147	-29.3762	PS
RandWithin	0	0.126534	0.053681	Bridget	F	3.20174	-29.5586	PS
RandWithin	0	0.438	0.008	Bridget	F	3.22331	-28.7352	PS
RandWithin	0	0.300775	0.0387597	Bridget	F	3.1455	-29.8578	PS
RandWithin	0	0.264925	0.0261194	Bridget	F	2.91344	-30.156	PS
RandWithin	0	0.184182	0.00108342	Bridget	F	2.86864	-28.5302	PS
RandWithin	0	0.309771	0.010395	Bridget	F	2.55001	-28.7314	PS
RandWithin	0	0.34811	0.0104302	Bridget	F	3.38395	-28.6175	PS
RandWithin	0	0.651163	0.00872093	Bridget	F	2.91252	-28.7544	PS
RandWithin	0	0.389189	0.00540541	Bridget	F	3.14732	-29.8154	PS
RandWithin	0	0.484962	0	Bridget	F	1.80782	-29.1076	PS
RandWithin	0	0.216774	0.00903226	Bridget	F	2.26511	-30.4651	PS
RandWithin	0	0.0182232	0.00455581	Bridget	F	3.19347	-30.222	PS
RandWithin	0	0.298143	0.00684262	Bridget	F	2.49478	-29.0935	PS
RandWithin	0	0.171949	0.00871632	Edna	F	3.11304	-23.7118	PS
RandWithin	0	0.198658	0.00402685	Edna	F	3.0357	-23.9954	PS
RandWithin	0	0.297573	0.00893997	Edna	F	3.37996	-24.6454	PS
RandWithin	0	0.220539	0.0016835	Edna	F	2.94868	-23.3725	PS
RandWithin	0	0.342991	0.00469851	Edna	F	2.70803	-23.3583	PS
RandWithin	0	0.563036	0.00305998	Edna	F	2.10431	-24.2043	PS
RandWithin	0	0.510758	0	Edna	F	3.36511	-23.7657	PS
RandWithin	0	0.168675	0	Edna	F	2.9891	-23.9063	PS
RandWithin	0	0.400231	0.0126874	Edna	F	2.97019	-23.7348	PS
RandWithin	0	0.318571	0	Edna	F	3.24417	-23.698	PS
RandWithin	0	0.299312	0.00114679	Edna	F	2.43716	-24.4726	PS
RandWithin	0	0.512492	0.00121877	Edna	F	3.14861	-23.4841	PS
RandWithin	0	0.00457317	0.00152439	Edna	F	2.72174	-24.5548	PS
RandWithin	0	0.273405	0.0091135	Edna	F	3.20963	-23.3503	PS
RandWithin	0	0.127943	0.0573183	Edna	F	2.62471	-23.4769	PS
RandWithin	0	0.300474	0.0104265	Edna	F	2.98609	-24.2893	PS
RandWithin	0	0.222727	0.01	Edna	F	2.73579	-24.4224	PS
RandWithin	0	0.259615	0.00721154	Edna	F	2.49444	-24.1548	PS
RandWithin	0	0.0945406	0.045273	Edna	F	2.77375	-23.2728	PS
RandWithin	0	0.233402	0.0259336	Edna	F	2.88295	-23.2709	PS
RandWithin	0	0.111538	0.0025641	Edna	F	2.49827	-23.8513	PS
RandWithin	0	0.260116	0	Edna	F	2.93896	-24.4948	PS
RandWithin	0	0.124231	0.0332103	Edna	F	2.70121	-23.7064	PS
RandWithin	0	0.283547	0.0105018	Edna	F	2.8395	-24.3704	PS
RandWithin	0	0.29703	0.0309406	Edna	F	3.38965	-23.6047	PS
RandWithin	0	0.301016	0.00092336	Edna	F	2.5841	-24.0516	PS
RandWithin	0	0.290709	0.011988	Edna	F	2.99058	-23.0795	PS
RandWithin	0	0.278981	0.0101911	Edna	F	2.09682	-23.7043	PS
RandWithin	0	0.27937	0.012894	Edna	F	3.08307	-23.4877	PS
RandWithin	0	0.178832	0.0717762	Edna	F	3.41142	-24.822	PS
RandWithin	0	0.180225	0.0162703	Edna	F	3.14666	-23.6313	PS
RandWithin	0	0.208223	0.00530504	Edna	F	2.52694	-24.4548	PS
RandWithin	0	0.427003	0.00109769	Edna	F	3.33158	-23.8094	PS
RandWithin	0	0.0135338	0.0616541	Edna	F	3.09687	-24.2104	PS
RandWithin	0	0.249664	0	Edna	F	2.93935	-23.9773	PS
RandWithin	0	0.121658	0.0240642	Edna	F	1.9568	-25.2355	PS
RandWithin	0	0.328358	0.0159204	Edna	F	2.89997	-23.1103	PS
RandWithin	0	0.260274	0.00136986	Edna	F	2.76885	-23.469	PS
RandWithin	0	0.294816	0.0291577	Edna	F	3.28314	-23.6824	PS
RandWithin	0	0.179372	0.014574	Edna	F	2.75658	-23.6152	PS
RandWithin	0	0.502336	0.021028	Edna	F	2.93412	-24.8405	PS
RandWithin	0	0.287742	0.0335484	Edna	F	3.04135	-24.08	PS
RandWithin	0	0.257186	0.00302572	Helen	F	2.25942	-23.7061	PS
RandWithin	0	0	0.00133156	Helen	F	3.07731	-22.5114	PS
RandWithin	0	0.487835	0.00486618	Helen	F	3.24154	-22.6924	PS
RandWithin	0	0.346008	0.0095057	Helen	F	3.40233	-22.4631	PS
RandWithin	0	0.340295	0.0036855	Helen	F	3.2153	-21.2692	PS
RandWithin	0	0.418719	0	Helen	F	2.99634	-21.3551	PS
RandWithin	0	0.059322	0.00338983	Helen	F	3.36661	-24.6639	PS
RandWithin	0	0.141436	0	Helen	F	3.30618	-21.2153	PS
RandWithin	0	0.468268	0	Helen	F	2.93992	-21.3081	PS
RandWithin	0	0.266332	0	Helen	F	3.18835	-23.9546	PS
RandWithin	0	0.165756	0.010929	Helen	F	3.40756	-21.5921	PS
RandWithin	0	0.198157	0.00460829	Helen	F	3.14358	-23.0252	PS
RandWithin	0	0.359477	0.0261438	Helen	F	3.40968	-23.264	PS
RandWithin	0	0.0219298	0.0394737	Helen	F	3.38329	-21.3115	PS
RandWithin	0	0	0.0017452	Helen	F	3.32848	-22.9959	PS
RandWithin	0	0.223172	0.0303894	Helen	F	2.19633	-23.044	PS
RandWithin	0	0.349711	0	Helen	F	2.6334	-23.0018	PS
RandWithin	0	0.423963	0.00263331	Helen	F	2.87429	-23.2862	PS
RandWithin	0	0.237023	0.0127326	Helen	F	2.58786	-22.9984	PS
RandWithin	0	0.258005	0.00184729	Helen	F	3.21991	-21.9347	PS
RandWithin	0	0.255565	0.0106857	Helen	F	3.10625	-21.3747	PS
RandWithin	0	0.419901	0.00099502	Helen	F	2.73555	-21.3666	PS
RandWithin	0	0.0695122	0.109756	Helen	F	3.17077	-21.7053	PS
RandWithin	0	0.127027	0.00540541	Helen	F	3.05847	-22.7231	PS
RandWithin	0	0.124861	0.00334448	Helen	F	3.4081	-22.1182	PS
RandWithin	0	0.012474	0.00623701	Helen	F	3.29916	-23.9738	PS
RandWithin	0	0.354369	0.00728155	Helen	F	2.45465	-21.3809	PS
RandWithin	0	0.0900141	0.0196906	Helen	F	3.40635	-24.2308	PS
RandWithin	0	0.330144	0.00119617	Helen	F	3.00306	-22.9272	PS
RandWithin	0	0.313559	0.00847458	Helen	F	3.27551	-23.4897	PS
RandWithin	0	0.109661	0	Helen	F	2.10085	-23.4332	PS
RandWithin	0	0	0.00245399	Helen	F	3.28118	-23.3161	PS
RandWithin	0	0.25802	0.0041841	Helen	F	3.09851	-23.0315	PS
RandWithin	0	0.129371	0.018648	Helen	F	3.20648	-22.9161	PS
RandWithin	0	0.0010989	0.00769231	Helen	F	3.07254	-23.695	PS
RandWithin	0	0.260231	0.00104932	Helen	F	3.25237	-21.4037	PS
RandWithin	0	0.00961538	0.145604	Helen	F	2.60977	-24.6998	PS
RandWithin	0	0.0236613	0.0298879	Helen	F	3.40669	-22.7054	PS
RandWithin	0	0.279799	0.00878294	Helen	F	2.93492	-22.9943	PS
RandWithin	0	0.471655	0.0136054	Helen	F	3.41354	-23.7201	PS
RandWithin	0	0.29011	0.00659341	Helen	F	3.29069	-21.1515	PS
RandWithin	0	0.21761	0.00754717	Helen	F	2.87166	-22.8363	PS
RandWithin	0	0.320937	0.00413223	Helen	F	3.40039	-24.466	PS
RandWithin	0	0.332701	0.00189573	Helen	F	3.28344	-22.0226	PS
RandWithin	0	0.242347	0.00765306	Helen	F	3.29612	-21.2658	PS
RandWithin	0	0.0706767	0.00601504	Helen	F	3.00409	-22.9281	PS
RandWithin	0	0.402985	0.00263389	Sam	M	2.92737	-28.683	PS
RandWithin	0	0.344965	0.00199402	Sam	M	3.20701	-28.8411	PS
RandWithin	0	0.44898	0.00185529	Sam	M	2.10276	-28.7826	PS
RandWithin	0	0.238361	0.0353818	Sam	M	2.80603	-30.1053	PS
RandWithin	0	0.242925	0.0400943	Sam	M	3.2359	-30.1924	PS
RandWithin	0	0.122004	0.0827887	Sam	M	3.0991	-30.2199	PS
RandWithin	0	0.378601	0.00411523	Sam	M	3.32964	-29.3104	PS
RandWithin	0	0.0209581	0.0838323	Sam	M	2.58981	-28.6481	PS
RandWithin	0	0.057377	0.034153	Sam	M	3.35229	-29.6083	PS
RandWithin	0	0.0437756	0.0355677	Sam	M	1.75695	-28.8539	PS
RandWithin	0	0.322969	0	Sam	M	3.29086	-28.7	PS
RandWithin	0	0.256391	0.00827068	Sam	M	3.41397	-29.6487	PS
RandWithin	0	0.184173	0.00863309	Sam	M	3.00907	-29.2141	PS
RandWithin	0	0.231228	0.129917	Sam	M	3.29262	-29.6097	PS
RandWithin	0	0.100569	0	Sam	M	3.24952	-29.7265	PS
RandWithin	0	0.322618	0.0585534	Sam	M	3.04344	-25.3632	PS
RandWithin	0	0.275705	0.0400364	Sam	M	2.3045	-23.1899	PS
RandWithin	0	0.116851	0.0528905	Sam	M	3.01787	-25.3683	PS
RandWithin	0	0.382917	0	Sam	M	3.35764	-24.0173	PS
RandWithin	0	0.381264	0.0462963	Sam	M	3.06639	-23.1043	PS
RandWithin	0	0.467169	0.00107643	Sam	M	3.11583	-23.4825	PS
RandWithin	0	0.0692308	0.0102564	Sam	M	3.38142	-25.3561	PS
RandWithin	0	0.376222	0.00407166	Sam	M	2.70991	-23.6357	PS
RandWithin	0	0.427451	0.0205882	Sam	M	3.07558	-25.2608	PS
RandWithin	0	0.0123457	0.00308642	Sam	M	3.07103	-24.1121	PS
RandWithin	0	0.135706	0.0422692	Sam	M	2.99928	-25.1993	PS
RandWithin	0	0	0.0129199	Sam	M	3.20746	-25.4159	PS
RandWithin	0	0.437876	0	Sam	M	2.93352	-23.4236	PS
RandWithin	0	0.0260973	0.0308422	Sam	M	3.30659	-25.0063	PS
RandWithin	0	0.445587	0.100257	Sam	M	2.95656	-25.9613	PS
RandWithin	0	0.222703	0.00216216	Sam	M	2.62791	-24.1147	PS
RandWithin	0	0.467507	0.0106693	Sam	M	3.39385	-25.6853	PS
RandWithin	0	0.236364	0.00320856	Sam	M	2.63487	-24.0894	PS
RandWithin	0	0.403458	0.00648415	Sam	M	2.8268	-23.4073	PS
RandWithin	0	0.335015	0.0171544	Sam	M	3.142	-23.9796	PS
RandWithin	0	0.00813008	0.0255517	Sam	M	3.41176	-24.1595	PS
RandWithin	0	0.466196	0.00504541	Sam	M	3.1623	-25.4827	PS
RandWithin	0	0.00993378	0.0215232	Jack	M	3.16781	-29.4536	PS
RandWithin	0	0.228669	0.0420933	Jack	M	3.21963	-29.3719	PS
RandWithin	0	0.0660377	0.0215633	Jack	M	3.17328	-29.1608	PS
RandWithin	0	0.198433	0.0261097	Jack	M	3.00952	-29.7206	PS
RandWithin	0	0.405842	0	Jack	M	3.1508	-29.9081	PS
RandWithin	0	0.192532	0.0128355	Jody	M	2.41528	-27.7187	PS
RandWithin	0	0.460606	0.00606061	Jody	M	3.41225	-28.0108	PS
RandWithin	0	0.147423	0.00515464	Jody	M	3.28365	-27.3304	PS
RandWithin	0	0	0.00123305	Jody	M	2.91884	-27.8662	PS
RandWithin	0	0.416667	0.00431034	Jody	M	3.4018	-27.6516	PS
RandWithin	0	0.268802	0.00139276	Jody	M	3.24726	-28.1161	PS
RandWithin	0	0.287028	0.0132789	Jody	M	3.33981	-27.8983	PS
RandWithin	0	0.385885	0.00183318	Jody	M	3.31443	-27.9372	PS
RandWithin	0	0.159046	0.0437376	Jody	M	2.74342	-26.9502	PS
RandWithin	0	0.173745	0.00772201	Jody	M	3.30261	-27.3584	PS
RandWithin	0	0.165622	0.0170098	Jody	M	2.87127	-27.3046	PS
RandWithin	0	0.369497	0.0246331	Jody	M	3.17709	-28.432	PS
RandWithin	0	0.232512	0.00492611	Jody	M	3.08579	-27.975	PS
RandWithin	0	0.454148	0.0014556	Jody	M	3.4072	-27.5114	PS
RandWithin	0	0.262931	0.00143678	Jody	M	2.7041	-27.1148	PS
RandWithin	0	0.0290948	0.0172414	Jody	M	3.00776	-27.5078	PS
RandWithin	0	0.279621	0.00592417	Jody	M	2.92204	-28.0849	PS
RandWithin	0	0.153716	0.00168919	Jody	M	1.49797	-27.5389	PS
RandWithin	0	0.190302	0.00548948	Jody	M	2.64671	-27.7897	PS
RandWithin	0	0.116057	0.00158983	Jody	M	3.0832	-28.5958	PS
RandWithin	0	0.447987	0	Jody	M	2.77468	-27.3625	PS
RandWithin	0	0.387972	0.00707547	Jody	M	3.37766	-28.0292	PS
RandWithin	0	0.303586	0.00239044	Jody	M	2.77348	-27.7643	PS
RandWithin	0	0.107604	0.0373027	Jody	M	3.06794	-27.3015	PS
RandWithin	0	0.465079	0.00079365	Jody	M	3.21437	-27.5376	PS
RandWithin	0	0.21118	0.00310559	Jody	M	2.64284	-28.0454	PS
RandWithin	0	0.291103	0.00580271	Jody	M	2.91119	-28.3341	PS
RandWithin	0	0.213683	0.00093721	Jody	M	2.85416	-28.1051	PS
RandWithin	0	0.432143	0.00267857	Jody	M	2.77163	-29.1945	PS
RandWithin	0	0.220056	0.00557103	Jody	M	3.25895	-28.3111	PS
RandWithin	0	0.325074	0.00693756	Lou	M	2.80679	-23.9596	WW
RandWithin	0	0.490424	0.0278584	Lou	M	2.57588	-29.7313	WW
RandWithin	0	0.568121	0.00267142	Lou	M	0.987115	-28.1387	WW
RandWithin	0	0.713726	0.0421569	Lou	M	2.92065	-29.6875	WW
RandWithin	0	0.559073	0.0285714	Lou	M	1.40176	-24.2124	WW
RandWithin	0	0.503554	0.0841232	Lou	M	1.67718	-26.1011	WW
RandWithin	0	0.677289	0.100987	Lou	M	1.1859	-29.0948	WW
RandWithin	0	0.784675	0.0518914	Lou	M	1.17427	-29.9735	WW
RandWithin	0	0.802857	0.0371429	Lou	M	3.07027	-22.9464	WW
RandWithin	0	0.281843	0.0474255	Lou	M	2.59485	-30.9063	WW
RandWithin	0	0.462537	0.00699301	Phantom	M	2.97132	-29.3111	WW
RandWithin	0	0.0617886	0.0357724	Phantom	M	3.08182	-29.527	WW
RandWithin	0	0.610224	0.0713525	Phantom	M	3.24942	-30.3609	WW
RandWithin	0	0.110236	0.104987	Phantom	M	2.96315	-29.7102	WW
RandWithin	0	0.0347155	0.0154291	Phantom	M	3.00847	-30.2627	WW
RandWithin	0	0.48188	0.00391773	Phantom	M	2.55579	-29.3813	WW
RandWithin	0	0.173416	0.0342679	Phantom	M	3.08181	-29.8908	WW
RandWithin	0	0.00252525	0.0997475	Phantom	M	3.11966	-29.7227	WW
RandWithin	0	0.281933	0.0333717	Phantom	M	2.82891	-30.3764	WW
RandWithin	0	0.544367	0.0149551	Phantom	M	2.50486	-29.2182	WW
RandWithin	0	0.221277	0.121986	Phantom	M	2.81969	-30.4459	WW
RandWithin	0	0.326429	0.0356255	Phantom	M	2.90992	-30.2679	WW
RandWithin	0	0.409867	0.0768501	Phantom	M	3.04617	-29.2061	WW
RandWithin	0	0.428886	0.00330761	Phantom	M	3.19702	-30.2211	WW
RandWithin	0	0.183879	0.0214106	Phantom	M	3.05179	-30.6233	WW
RandWithin	0	0.274713	0.0574713	Phantom	M	3.10683	-29.3484	WW
RandWithin	0	0.475219	0.0126336	Phantom	M	2.93824	-29.3048	WW
RandWithin	0	0.256602	0.0269805	Phantom	M	3.23468	-30.1082	WW
RandWithin	0	0.138914	0.0347284	Phantom	M	2.29628	-30.1155	WW
RandWithin	0	0.537662	0.0155844	Phantom	M	3.40822	-29.6098	WW
RandWithin	0	0	0.0338346	Phantom	M	3.09181	-31.8965	WW
RandWithin	0	0.126996	0.0674891	Phantom	M	3.17495	-30.2456	WW
RandWithin	0	0.277465	0	Phantom	M	3.15253	-30.1561	WW
RandWithin	0	0.174792	0.0107015	Phantom	M	2.83839	-30.359	WW
RandWithin	0	0.428964	0.00549954	Phantom	M	2.84637	-29.8278	WW
RandWithin	0	0.592279	0.0310734	Phantom	M	2.21134	-30.0317	WW
RandWithin	0	0.540444	0.0142222	Phantom	M	3.28504	-29.5156	WW
RandWithin	0	0.172144	0.0782473	Phantom	M	3.31556	-29.771	WW
RandWithin	0	0.636564	0.0671806	Phantom	M	2.533	-30.1993	WW
RandWithin	0	0.241484	0.00605602	Phantom	M	3.09187	-30.3289	WW
RandWithin	0	0.582226	0.0415282	Phantom	M	3.11312	-29.9897	WW
RandWithin	0	0.0584416	0.0415584	Phantom	M	3.02235	-30.1548	WW
RandWithin	0	0.283436	0.148466	Phantom	M	2.87523	-29.9324	WW
RandWithin	0	0.60495	0.00183318	Bridget	F	1.73625	-28.8939	WW
RandWithin	0	0.291447	0.0179514	Bridget	F	2.56369	-29.1575	WW
RandWithin	0	0.411765	0.00887902	Bridget	F	3.00926	-30.0106	WW
RandWithin	0	0.341306	0.0588776	Bridget	F	3.16271	-30.5192	WW
RandWithin	0	0.374889	0.00534283	Bridget	F	3.41335	-30.1927	WW
RandWithin	0	0.352801	0.0405244	Bridget	F	3.29064	-29.8889	WW
RandWithin	0	0.354191	0.0519481	Bridget	F	2.64493	-30.0595	WW
RandWithin	0	0.62785	0.002443	Bridget	F	2.83629	-28.6456	WW
RandWithin	0	0.409628	0.00181653	Bridget	F	2.82819	-28.72	WW
RandWithin	0	0.168472	0.00361011	Bridget	F	3.35961	-29.48	WW
RandWithin	0	0.225434	0.00082576	Bridget	F	3.12445	-29.0015	WW
RandWithin	0	0.39794	0.011236	Bridget	F	2.71501	-28.8015	WW
RandWithin	0	0.442639	0.00095602	Bridget	F	3.34297	-29.2179	WW
RandWithin	0	0.0651629	0.0100251	Bridget	F	3.23248	-31.1884	WW
RandWithin	0	0.436793	0.0924974	Bridget	F	3.32877	-29.4323	WW
RandWithin	0	0.541391	0.103201	Bridget	F	2.27722	-30.4343	WW
RandWithin	0	0.455257	0.0816555	Bridget	F	3.11436	-30.4702	WW
RandWithin	0	0.0068306	0.00546448	Bridget	F	1.9955	-30.8857	WW
RandWithin	0	0.302128	0.00851064	Bridget	F	3.38708	-30.3662	WW
RandWithin	0	0.441146	0.0460594	Bridget	F	3.09788	-30.4875	WW
RandWithin	0	0.266596	0.00105374	Edna	F	2.68078	-23.3836	WW
RandWithin	0	0.300588	0.00419815	Edna	F	2.80499	-23.4112	WW
RandWithin	0	0.281106	0.0725806	Edna	F	1.68908	-24.2216	WW
RandWithin	0	0.451113	0.0300097	Edna	F	3.345	-24.6301	WW
RandWithin	0	0.502294	0.0516055	Edna	F	3.03122	-28.2479	WW
RandWithin	0	0.236695	0.166667	Edna	F	2.19514	-27.6222	WW
RandWithin	0	0.372311	0.0196445	Edna	F	2.97291	-25.1668	WW
RandWithin	0	0.542677	0.0557053	Edna	F	3.40735	-25.2165	WW
RandWithin	0	0.500675	0.00674764	Helen	F	3.16344	-22.8932	WW
RandWithin	0	0.289597	0.00656045	Helen	F	3.17803	-21.9734	WW
RandWithin	0	0.244582	0.00412797	Helen	F	3.24958	-21.4562	WW
RandWithin	0	0.403202	0.00218341	Sam	M	3.06087	-29.7096	WW
RandWithin	0	0.103497	0.0461538	Sam	M	2.83139	-30.401	WW
RandWithin	0	0.571672	0.131399	Sam	M	3.11261	-29.3983	WW
RandWithin	0	0.61943	0.030303	Sam	M	2.42428	-30.1436	WW
RandWithin	0	0.312925	0.0435374	Sam	M	3.1485	-30.5312	WW
RandWithin	0	0.185464	0.0100251	Sam	M	2.70177	-29.2306	WW
RandWithin	0	0.00586854	0.0305164	Sam	M	3.3664	-30.8768	WW
RandWithin	0	0.396349	0.00130378	Sam	M	3.38805	-29.7999	WW
RandWithin	0	0.438111	0.00814332	Sam	M	2.7802	-30.2628	WW
RandWithin	0	0.185031	0.00831601	Sam	M	3.30277	-29.3537	WW
RandWithin	0	0.604338	0.052755	Sam	M	3.34483	-30.4274	WW
RandWithin	0	0.16	0.0140741	Sam	M	3.34838	-25.5652	WW
RandWithin	0	0.328059	0.00738397	Sam	M	3.08375	-24.9715	WW
RandWithin	0	0.485856	0.0169731	Sam	M	3.39172	-25.7494	WW
RandWithin	0	0.443954	0.00264784	Sam	M	2.84779	-24.4234	WW
RandWithin	0	0.697108	0.00456621	Sam	M	2.67546	-25.7825	WW
RandWithin	0	0.435733	0.00449871	Sam	M	3.25438	-25.7824	WW
RandWithin	0	0.41506	0.00459137	Sam	M	3.14068	-25.6966	WW
RandWithin	0	0.488226	0	Sam	M	3.32032	-25.8703	WW
RandWithin	0	0.384808	0.048414	Sam	M	3.35459	-25.6376	WW
RandWithin	0	0.180495	0.0131004	Jack	M	2.8901	-29.5601	WW
RandWithin	0	0.367914	0.028877	Jack	M	3.32515	-30.5895	WW
RandWithin	0	0.147643	0.00620347	Jack	M	3.21884	-30.1726	WW
RandWithin	0	0.0258621	0.0143678	Jack	M	2.97709	-30.2619	WW
RandWithin	0	0.159161	0.0504658	Jack	M	2.94119	-30.7295	WW
RandWithin	0	0.514218	0.0218009	Jack	M	3.26676	-30.1876	WW
RandWithin	0	0.0555556	0.00945626	Jack	M	3.18286	-30.2376	WW
RandWithin	0	0.465062	0.0248447	Jack	M	2.8098	-30.2657	WW
RandWithin	0	0.315436	0.179866	Jack	M	3.24395	-30.3714	WW
RandWithin	0	0.189333	0.0186667	Jack	M	2.89921	-31.1933	WW
RandWithin	0	0.506276	0.00585774	Jack	M	3.37359	-30.2662	WW
RandWithin	0	0.318671	0.00807899	Jack	M	3.09427	-30.2845	WW
RandWithin	0	0.078453	0.0508287	Jack	M	3.13194	-30.0014	WW
RandWithin	0	0.616516	0.161765	Jack	M	1.77145	-30.0089	WW
RandWithin	0	0.386536	0.00868621	Jack	M	3.41339	-29.9454	WW
RandWithin	0	0.117249	0.00225479	Jody	M	2.24813	-28.0746	WW
RandWithin	0	0.388462	0.00576923	Jody	M	2.27379	-29.0252	WW
Snake	1	0.140165	0.00824499	Helen	F	2.70148	-24.5223	FOR
Snake	1	0.227088	0.00814664	Lou	M	2.67919	-21.8152	FOR
Snake	1	0.146413	0.00146413	Lou	M	2.87849	-24.208	FOR
Snake	1	0.19909	0.00113766	Lou	M	2.64051	-21.2842	FOR
Snake	1	0.461872	0.0017331	Phantom	M	3.18615	-29.2746	FOR
Snake	1	0.633729	0.0711462	Phantom	M	2.76184	-29.6866	FOR
Snake	1	0.376	0.0773333	Phantom	M	3.14854	-28.7899	FOR
Snake	1	0.537624	0.0188119	Phantom	M	3.32131	-29.0026	FOR
Snake	1	0.617566	0.0073193	Phantom	M	2.6586	-28.8066	FOR
Snake	1	0.458045	0.00789733	Phantom	M	3.28644	-28.8782	FOR
Snake	1	0.342179	0.0879888	Phantom	M	2.72837	-28.793	FOR
Snake	1	0.619091	0.0809091	Phantom	M	2.8272	-29.047	FOR
Snake	1	0.503846	0.00288462	Phantom	M	3.13189	-29.6637	FOR
Snake	1	0.493176	0.00545951	Phantom	M	3.14009	-29.624	FOR
Snake	1	0.292172	0.00606395	Phantom	M	3.2573	-29.7721	FOR
Snake	1	0.346457	0.0354331	Bridget	F	1.85482	-29.87	FOR
Snake	1	0.404531	0.00107875	Bridget	F	3.20719	-29.4595	FOR
Snake	1	0	0.1	Bridget	F	3.11515	-31.2697	FOR
Snake	1	0	0.0327225	Bridget	F	3.33555	-31.4633	FOR
Snake	1	0.096564	0.0557103	Bridget	F	3.39257	-31.1839	FOR
Snake	1	0.352034	0	Bridget	F	3.28084	-29.4174	FOR
Snake	1	0.422939	0.00597372	Edna	F	3.41421	-24.6462	FOR
Snake	1	0.422195	0.00603136	Edna	F	3.41396	-24.6426	FOR
Snake	1	0.462604	0.0692521	Jack	M	3.2181	-30.4221	FOR
Snake	1	0.256997	0.0508906	Jack	M	3.40407	-30.2199	FOR
Snake	1	0.38404	0.105985	Jack	M	3.37247	-30.3604	FOR
Snake	1	0.24602	0.00434153	Jody	M	1.70552	-27.86	FOR
Snake	1	0.549388	0.0187755	Lou	M	3.13051	-24.4726	FOR
Snake	1	0.737872	0.0144681	Lou	M	3.2341	-24.1953	FOR
Snake	1	0.369565	0.162404	Lou	M	2.70449	-30.7167	FOR
Snake	1	0.35619	0.0114286	Sam	M	2.07178	-30.326	FOR
Snake	1	0.054455	0.12995	Phantom	M	2.96896	-30.3943	FOR
Snake	1	0.316539	0.0109529	Edna	F	3.21592	-25.0869	FOR
Snake	1	0.234683	0.00103842	Jody	M	3.24227	-28.2855	FOR
Snake	1	0.007528	0.0489335	Sam	M	2.88751	-24.1114	FP
Snake	1	0.131579	0.00701754	Jody	M	2.86169	-27.4737	FP
Snake	1	0.132635	0.0069808	Jody	M	2.85277	-27.4728	FP
Snake	1	0.032544	0.00591716	Helen	F	3.34982	-22.731	FP
Snake	1	0.032593	0.00592593	Helen	F	3.35094	-22.731	FP
Snake	1	0.2144	0.0688	Phantom	M	3.26618	-30.4968	HW
Snake	1	0.19105	0.208262	Phantom	M	2.91594	-30.3371	HW
Snake	1	0.214096	0.134309	Phantom	M	3.28578	-30.4166	HW
Snake	1	0.335294	0.0164706	Phantom	M	3.29565	-30.0199	HW
Snake	1	0.20303	0.116667	Phantom	M	3.29588	-30.4439	HW
Snake	1	0.076855	0.00795053	Phantom	M	3.26296	-30.309	HW
Snake	1	0.076807	0.185241	Phantom	M	3.0795	-30.3043	HW
Snake	1	0.386555	0.0252101	Phantom	M	2.67381	-30.1161	HW
Snake	1	0.00554	0.00554017	Phantom	M	3.41418	-30.5927	HW
Snake	1	0.286787	0.16967	Phantom	M	3.03947	-30.2803	HW
Snake	1	0.219259	0.145185	Phantom	M	3.02517	-30.3392	HW
Snake	1	0.200517	0.0698577	Phantom	M	3.16493	-30.3689	HW
Snake	1	0.27724	0.0690073	Phantom	M	2.9372	-30.368	HW
Snake	1	0.290462	0.104046	Phantom	M	3.09283	-30.328	HW
Snake	1	0.297839	0.138889	Phantom	M	3.28169	-30.3649	HW
Snake	1	0.184943	0.0785597	Phantom	M	3.33909	-30.5159	HW
Snake	1	0.224719	0.125	Phantom	M	2.98615	-30.3361	HW
Snake	1	0.168869	0.13069	Phantom	M	3.03197	-30.3272	HW
Snake	1	0.161876	0.149773	Phantom	M	3.02255	-30.3196	HW
Snake	1	0.193833	0.139501	Phantom	M	3.00327	-30.3276	HW
Snake	1	0.081361	0.107988	Phantom	M	3.11925	-30.3626	HW
Snake	1	0	0.00594648	Phantom	M	2.9179	-30.5688	HW
Snake	1	0.347051	0.131687	Phantom	M	2.9316	-30.3243	HW
Snake	1	0	0.00240096	Bridget	F	2.93828	-31.3121	HW
Snake	1	0.019973	0.0758988	Bridget	F	2.83164	-31.1814	HW
Snake	1	0.251482	0.00084674	Bridget	F	3.06976	-30.4475	HW
Snake	1	0.410734	0.0580504	Jack	M	3.00513	-30.2853	HW
Snake	1	0.007795	0.00668151	Jack	M	3.2633	-30.4903	HW
Snake	1	0.085319	0.0299769	Jack	M	3.16259	-30.0686	HW
Snake	1	0.116505	0.039644	Jack	M	3.19816	-30.0545	HW
Snake	1	0.116317	0.03958	Jack	M	3.1908	-30.0544	HW
Snake	1	0.064781	0.00821168	Jack	M	3.24721	-30.3287	HW
Snake	1	0.064781	0.00821168	Jack	M	3.24721	-30.3287	HW
Snake	1	0.064781	0.00821168	Jack	M	3.24721	-30.3287	HW
Snake	1	0.064781	0.00821168	Jack	M	3.24721	-30.3287	HW
Snake	1	0.064781	0.00821168	Jack	M	3.24721	-30.3287	HW
Snake	1	0.064781	0.00821168	Jack	M	3.24721	-30.3287	HW
Snake	1	0.064781	0.00821168	Jack	M	3.24721	-30.3287	HW
Snake	1	0.384514	0.0485564	Jack	M	3.1043	-30.3036	HW
Snake	1	0.383812	0.0483029	Jack	M	3.10394	-30.3036	HW
Snake	1	0.409499	0.0218229	Jody	M	3.06937	-30.5944	HW
Snake	1	0.343636	0	Jody	M	3.39194	-28.4923	HW
Snake	1	0.343636	0	Jody	M	3.39194	-28.4923	HW
Snake	1	0.170601	0.00214592	Jody	M	2.1353	-28.0099	HW
Snake	1	0.06993	0.16958	Phantom	M	3.40232	-30.3248	OW
Snake	1	0.056507	0.15411	Phantom	M	2.65625	-30.3295	OW
Snake	1	0.102941	0.0551471	Phantom	M	3.35798	-30.2942	OW
Snake	1	0.123077	0.0271493	Edna	F	3.24496	-23.4726	PS
Snake	1	0.442162	0.00216216	Edna	F	1.84433	-23.7806	PS
Snake	1	0.250825	0.00770077	Lou	M	3.06054	-21.0921	PS
Snake	1	0.30144	0	Lou	M	2.8227	-20.9556	PS
Snake	1	0.494108	0.00673401	Sam	M	3.16736	-23.4145	PS
Snake	1	0.343858	0.00401837	Sam	M	3.09355	-23.9802	PS
Snake	1	0.265217	0.0478261	Phantom	M	3.18557	-29.8016	PS
Snake	1	0.09287	0.0431396	Phantom	M	3.05493	-29.8423	PS
Snake	1	0.247706	0.0366972	Phantom	M	3.18995	-29.7469	PS
Snake	1	0.112516	0.0714286	Phantom	M	3.09063	-29.8663	PS
Snake	1	0.243323	0.0118694	Phantom	M	3.23894	-29.7036	PS
Snake	1	0.513545	0.0153121	Bridget	F	3.40281	-29.0393	PS
Snake	1	0.45119	0.0142857	Bridget	F	3.38758	-28.9967	PS
Snake	1	0.005013	0.018797	Bridget	F	3.09404	-30.2835	PS
Snake	1	0.006258	0.0225282	Bridget	F	3.04825	-30.1721	PS
Snake	1	0.165888	0.00350467	Bridget	F	3.03232	-28.9424	PS
Snake	1	0.350254	0.0406091	Bridget	F	3.21507	-29.1809	PS
Snake	1	0.379619	0.031355	Bridget	F	2.96154	-28.7276	PS
Snake	1	0.009756	0.00813008	Bridget	F	3.3679	-28.905	PS
Snake	1	0.277087	0.0603908	Bridget	F	3.31171	-29.9131	PS
Snake	1	0.122507	0.0042735	Bridget	F	3.25816	-29.7007	PS
Snake	1	0.089692	0.0227577	Bridget	F	3.30425	-29.3808	PS
Snake	1	0.296185	0.00200803	Edna	F	2.88842	-23.266	PS
Snake	1	0.328473	0.00943396	Edna	F	3.25205	-23.3056	PS
Snake	1	0.373856	0.00261438	Edna	F	2.88428	-24.5332	PS
Snake	1	0.236589	0.0729023	Edna	F	3.08813	-24.0663	PS
Snake	1	0.142857	0.00481541	Edna	F	2.9621	-23.609	PS
Snake	1	0.142857	0.00481541	Edna	F	2.9621	-23.609	PS
Snake	1	0.142857	0.00481541	Edna	F	2.9621	-23.609	PS
Snake	1	0.142857	0.00481541	Edna	F	2.9621	-23.609	PS
Snake	1	0.142857	0.00481541	Edna	F	2.9621	-23.609	PS
Snake	1	0.142857	0.00481541	Edna	F	2.9621	-23.609	PS
Snake	1	0.142857	0.00481541	Edna	F	2.9621	-23.609	PS
Snake	1	0.142857	0.00481541	Edna	F	2.9621	-23.609	PS
Snake	1	0.142857	0.00481541	Edna	F	2.9621	-23.609	PS
Snake	1	0.25887	0.00525624	Edna	F	3.16963	-24.4843	PS
Snake	1	0.188934	0.00674764	Edna	F	2.98336	-24.5938	PS
Snake	1	0.204142	0.0133136	Edna	F	2.8128	-23.7738	PS
Snake	1	0.381029	0.00482315	Edna	F	3.00015	-23.9102	PS
Snake	1	0.178372	0.00334448	Edna	F	2.47	-24.6083	PS
Snake	1	0.394336	0.0087146	Edna	F	3.36786	-23.7391	PS
Snake	1	0.163366	0.0903465	Edna	F	3.40992	-24.83	PS
Snake	1	0.206478	0	Edna	F	3.39782	-23.7076	PS
Snake	1	0.206478	0	Edna	F	3.39782	-23.7076	PS
Snake	1	0.206897	0	Edna	F	3.39782	-23.7076	PS
Snake	1	0.206687	0	Edna	F	3.39782	-23.7076	PS
Snake	1	0.206897	0	Edna	F	3.39782	-23.7076	PS
Snake	1	0.380952	0.0251572	Helen	F	3.191	-21.0482	PS
Snake	1	0.163223	0.0144628	Helen	F	3.3236	-21.923	PS
Snake	1	0.212346	0	Helen	F	2.89763	-21.1403	PS
Snake	1	0.345876	0.0347323	Helen	F	2.90744	-24.5356	PS
Snake	1	0.119015	0.00547196	Helen	F	2.79284	-23.1059	PS
Snake	1	0.125839	0.0486577	Helen	F	3.07662	-24.6451	PS
Snake	1	0.29712	0.0052356	Helen	F	3.18747	-23.0809	PS
Snake	1	0.221889	0.00149925	Helen	F	3.37998	-23.6414	PS
Snake	1	0.158654	0.0108173	Helen	F	3.3893	-22.9568	PS
Snake	1	0.227933	0.00893855	Helen	F	3.11042	-22.9815	PS
Snake	1	0.089184	0.0227704	Helen	F	3.10958	-23.1443	PS
Snake	1	0.04902	0.00816993	Helen	F	2.97824	-22.8735	PS
Snake	1	0.056	0.0144	Helen	F	3.25381	-23.0182	PS
Snake	1	0.059603	0.00993378	Helen	F	3.36982	-22.9674	PS
Snake	1	0.160594	0.00269906	Helen	F	2.94966	-22.8728	PS
Snake	1	0.311334	0.0071736	Helen	F	2.82417	-22.9017	PS
Snake	1	0.099542	0.00114416	Helen	F	3.33163	-21.033	PS
Snake	1	0.413415	0.00121951	Helen	F	3.33439	-22.6228	PS
Snake	1	0.406299	0.00314961	Helen	F	3.41292	-22.4803	PS
Snake	1	0	0.0078125	Helen	F	3.4074	-22.7659	PS
Snake	1	0	0.00796813	Helen	F	2.47975	-21.2271	PS
Snake	1	0.008237	0.00329489	Helen	F	3.40842	-22.8064	PS
Snake	1	0.156652	0.0150215	Helen	F	3.35686	-21.98	PS
Snake	1	0.450284	0.00142045	Helen	F	3.38043	-22.6301	PS
Snake	1	0.189103	0.017094	Helen	F	3.37872	-22.087	PS
Snake	1	0.119048	0.00250627	Helen	F	3.15885	-21.696	PS
Snake	1	0.189103	0.017094	Helen	F	3.37872	-22.087	PS
Snake	1	0.111801	0.00621118	Helen	F	3.27622	-21.7842	PS
Snake	1	0.111801	0.00621118	Helen	F	3.27622	-21.7842	PS
Snake	1	0.005666	0.0382436	Jack	M	3.08475	-29.51	PS
Snake	1	0.247674	0.0232558	Jody	M	3.10365	-27.4847	PS
Snake	1	0.246813	0.023175	Jody	M	3.107	-27.4846	PS
Snake	1	0.151134	0.0239295	Jody	M	3.11055	-27.5085	PS
Snake	1	0.221698	0.0188679	Jody	M	3.08344	-27.4814	PS
Snake	1	0.147095	0.0234858	Jody	M	3.09188	-27.4981	PS
Snake	1	0.338569	0.0078534	Jody	M	2.67206	-27.3851	PS
Snake	1	0.339885	0.018837	Jody	M	2.99563	-27.2956	PS
Snake	1	0.256461	0	Jody	M	2.55434	-27.5737	PS
Snake	1	0.240869	0.00098717	Jody	M	2.59165	-27.5831	PS
Snake	1	0.174658	0.010274	Jody	M	3.18059	-27.2123	PS
Snake	1	0.244475	0.0248619	Jody	M	3.14328	-27.2728	PS
Snake	1	0.239316	0.0235043	Jody	M	3.31822	-27.3246	PS
Snake	1	0.239316	0.0235043	Jody	M	3.31822	-27.3246	PS
Snake	1	0.239316	0.0235043	Jody	M	3.31822	-27.3246	PS
Snake	1	0.239316	0.0235043	Jody	M	3.31822	-27.3246	PS
Snake	1	0.239316	0.0235043	Jody	M	3.31822	-27.3246	PS
Snake	1	0.239316	0.0235043	Jody	M	3.31822	-27.3246	PS
Snake	1	0.239316	0.0235043	Jody	M	3.31822	-27.3246	PS
Snake	1	0.382637	0	Jody	M	3.22366	-27.6146	PS
Snake	1	0.357027	0.00161551	Jody	M	3.13653	-27.1449	PS
Snake	1	0.445769	0	Jody	M	3.2868	-27.5602	PS
Snake	1	0.278465	0.0408416	Jody	M	2.9015	-27.1197	PS
Snake	1	0.220472	0.00612423	Jody	M	2.68981	-27.3912	PS
Snake	1	0.178412	0.00356824	Jody	M	2.66059	-27.7563	PS
Snake	1	0.39156	0.00098135	Lou	M	2.94291	-21.6878	PS
Snake	1	0.413574	0.0243902	Lou	M	2.45718	-21.4808	PS
Snake	1	0.417297	0.0227027	Lou	M	2.38026	-21.4513	PS
Snake	1	0.254642	0.0212202	Lou	M	3.40516	-21.8769	PS
Snake	1	0.435501	0.0299278	Lou	M	3.18089	-24.7004	PS
Snake	1	0.507955	0.00909091	Lou	M	2.9023	-23.04	PS
Snake	1	0.430602	0.0189484	Lou	M	3.13579	-24.3065	PS
Snake	1	0.204713	0.0662739	Lou	M	2.83561	-22.6884	PS
Snake	1	0.117325	0.0942982	Lou	M	2.56379	-25.6108	PS
Snake	1	0.2375	0.00227273	Lou	M	3.03998	-22.7493	PS
Snake	1	0.236129	0.00645161	Lou	M	3.26236	-21.8222	PS
Snake	1	0.506554	0.0140449	Lou	M	2.96423	-23.4588	PS
Snake	1	0.402567	0.0175029	Lou	M	2.99037	-23.459	PS
Snake	1	0.483235	0.0167653	Lou	M	3.15651	-23.4574	PS
Snake	1	0.349642	0.00477327	Lou	M	2.58724	-23.0847	PS
Snake	1	0.335351	0.00605327	Lou	M	2.75923	-23.0696	PS
Snake	1	0.335351	0.00605327	Lou	M	2.75923	-23.0696	PS
Snake	1	0.404423	0.0260664	Lou	M	3.37482	-23.8495	PS
Snake	1	0.404423	0.0260664	Lou	M	3.37482	-23.8495	PS
[truncated: 76 more rows]
